# Supplementary material
Source: publisher figshare collection journal article supplement (https://acs.figshare.com/ndownloader/files/5770662)
Supplement: Supplementary file 1 [file 5770662]

## Supporting Information

### Experimental Section

All the reagents and solvents were purchased commercially and used without purification unless otherwise noted.  $^1\text{H}$  and  $^{13}\text{C}$  nuclear magnetic resonance (NMR) spectra were recorded in  $\text{CDCl}_3$  on a JEOL Alpha 500 or JEOL Lambda 500 spectrometers. Chemical shifts are reported in part per million (ppm) with tetramethylsilane (TMS) as an internal standard. Coupling constants ( $J$ ) are given in hertz (Hz) and the abbreviations s, d, t, q, br and m refer to singlet, doublet, triplet, quartet, broad and multiplet respectively. All the assignments were made based on  $^1\text{H}$ - $^1\text{H}$  COSY, HMQC and HMBC methods. Mass spectra (MS) were obtained with a Micromass Platform LC<sup>TM</sup> or a Micromass Q-ToF<sup>TM</sup> 2. Infrared spectra (IR) were recorded on a PerkinElmer Paragon 1000 spectrometer as KBr pellets and are reported as reciprocal centimeters ( $\text{cm}^{-1}$ ). Elemental analyses were performed by a PerkinElmer 2400 CHN analyzer. Melting Points were measured using a Mettler FP61 melting point instrument and are uncorrected.

**5-*O*-Desosaminyl-6-*O*-methylerythronolide A (1).** A mixture of clarithromycin (20 g, 26.74 mmol) and 2M aqueous hydrochloric acid (200 mL) was stirred at room temperature for 3h. The reaction mixture was washed with  $\text{CHCl}_3$ , and then was adjusted to pH10 with 2M NaOH solution, and was extracted with ethyl acetate. The organic layer was washed with brine, dried over  $\text{MgSO}_4$  and concentrated in vacuo. The residue was crystallized from ethyl acetate to afford 8.31g (53%) of **1** as a colorless powder: mp 237 – 239 °C; IR (KBr) 1728, 1693  $\text{cm}^{-1}$ ; HRMS (ES)  $m/z$  590.3894 [(M+H)<sup>+</sup>; calcd for  $\text{C}_{30}\text{H}_{56}\text{NO}_{10}$ : 590.3904]. Anal. Calcd for  $\text{C}_{30}\text{H}_{55}\text{NO}_{10}$ : C, 61.10; H, 9.40; N, 2.37. Found: C, 60.83; H, 9.30; N, 2.36.

**2, 3-Di-*O*-Acetyl-5-*O*-desosaminyl-6-*O*-methylerythronolide A (2).** To a solution of **1** (10.0 g, 17.0 mmol) in THF (150 mL) was added 4'-dimethylaminopyridine (1.04 g, 8.51 mmol), pyridine (11.0 mL, 0.14 mol) and acetyl chloride (4.82 mL, 67.8 mmol). The reaction mixture was stirred at room temperature for 4days. After evaporation of the solvent, the residue was diluted with ethyl acetate and washed with brine. The organic layer was dried over  $\text{MgSO}_4$  and concentrated under reduced pressure. The residue was purified by column chromatography eluting with MeOH/  $\text{CHCl}_3$  (2/ 98) to afford 7.82g (68%) of **2** as slight yellow amorphous. Crystals for X-ray analysis was obtained by recrystallization from

Et<sub>2</sub>O/ *n*-hexane: mp 211–213 °C. IR (KBr) 1749, 1742, 1694 cm<sup>-1</sup>  
; HRMS (ES) *m/z* 674.4118 [(M+H)<sup>+</sup>; calcd for C<sub>34</sub>H<sub>60</sub>NO<sub>12</sub>:674.4116]. Anal. Calcd for C<sub>34</sub>H<sub>59</sub>NO<sub>12</sub>: C, 60.60; H, 8.83; N, 2.08. Found: C, 60.55; H, 8.95; N, 2.08.

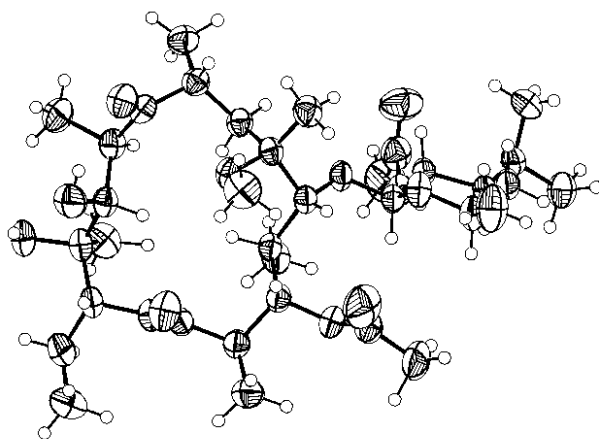

**Chart 1.** ORTEP drawing of the X-ray crystal structure of compound **2**

**3-*O*-Acetyl-5-*O*-desosaminyl-6-*O*-methylethyronolide A (3a).** A solution of **2** (3.47 g, 5.15 mmol) in MeOH (30 mL) was stirred at room temperature for 2 days. After evaporation of the solvent, the residue was purified by column chromatography eluting with MeOH/CHCl<sub>3</sub> (4/ 96) to afford 3.20g (98%) of **3a** as colorless amorphous: IR (KBr) 1739, 1688 cm<sup>-1</sup>; HRMS (ES) *m/z* 632.4019[(M+H)<sup>+</sup>; calcd for C<sub>32</sub>H<sub>58</sub>NO<sub>11</sub>: 632.4010]. Anal. Calcd for C<sub>32</sub>H<sub>57</sub>NO<sub>11</sub>: C, 60.83; H, 9.09; N, 2.22. Found: C, 60.52; H, 9.08; N, 2.25.

**2'-*O*-Acetyl-5-*O*-desosaminyl-6-*O*-methylethyronolide A (4)<sup>10</sup>.** To a solution of **1** (11.78 g, 0.02 mol) in acetone (100 mL) was added acetic anhydride (2.27 mL, 24 mmol) at 0 °C. After stirring at room temperature for 6 h, the reaction mixture was evaporated in vacuo. The residue was partitioned between CH<sub>2</sub>Cl<sub>2</sub> and the organic layer was saturated Na<sub>2</sub>CO<sub>3</sub>

solution, washed with brine, and dried over MgSO<sub>4</sub>. After evaporation of the solvent, the residue was purified by crystallization from Et<sub>2</sub>O/ *n*-hexane to give 12.17g (96%) of **4** as a colorless powder: LRMS (FAB) *m/z* 632(M+H)<sup>+</sup>.

**3-O-Cyanoacetyl-5-O-desosaminyl-6-O-methylerythronolide A (3b).** To a solution of **4** (816 mg, 1.29 mmol) in CH<sub>2</sub>Cl<sub>2</sub> (20 mL) was added cyanoacetic acid (0.68 g, 7.84 mmol), 1-[3-(dimethylamino)propyl]-3-ethylcarbodiimide hydrochloride (EDC-HCl) (1.48 g, 7.78 mmol), and 4'-dimethylaminopyridine (DMAP) (0.16 g, 1.31 mmol) at 0°C. After stirring at room temperature for 2days, the reaction mixture was partitioned between ethyl acetate and water, and the pH of the aqueous layer was adjusted to 10 with 2M NaOH solution. The organic layer was washed with saturated NH<sub>4</sub>Cl solution, and then dried over MgSO<sub>4</sub>. After evaporation of the solvent under reduced pressure, the residue was dissolved in MeOH (20 mL) and the solution was stirred at room temperature for 2days. The reaction mixture was evaporated in vacuo, and the residue was purified by column chromatography eluting with MeOH/ CHCl<sub>3</sub>/ 25% NH<sub>4</sub>OH (15.5/ 1/ 0.1) to afford 0.62 g (73%) of **3b** as colorless amorphous, along with 91 mg (12%) of recovered starting material **1**. **3b**: IR (KBr) 1753, 1693 cm<sup>-1</sup>; HRMS (ES) *m/z* 657.3958 [(M+H)<sup>+</sup>; calcd for C<sub>33</sub>H<sub>57</sub>N<sub>2</sub>O<sub>11</sub>: 657.3962]. Anal. Calcd for C<sub>33</sub>H<sub>56</sub>N<sub>2</sub>O<sub>11</sub>·H<sub>2</sub>O: C, 58.73; H, 8.66; N, 4.15. Found: C, 58.97; H, 8.56; N, 4.12.

**3-O-(N-tert-Butoxycarbonyl)glycyl-5-O-desosaminyl-6-O-methylerythronolide A (3d).** 2'-Acetate of the title compound was prepared from compound **4** (1.0 g, 1.58 mmol) and *N*-(tert-butoxycarbonyl)glycine (553 mg, 3.16 mmol) by the same procedures as described for **3b**. Purification by column chromatography eluting with acetone/ *n*-hexane/ Et<sub>3</sub>N (6/ 10/ 0.2) to afford 1.2 g (96%) of 2'-Ac **3d**. This product (0.8 g, 1.0mmol) was dissolved in MeOH (8 mL) and refluxed for 2h. After evaporation of the solvent, the residue was purified by column chromatography eluting with CHCl<sub>3</sub>/ MeOH/ 25% NH<sub>4</sub>OH (30/ 1/ 0.1) to afford 0.74 g (98%) of **3d** as colorless amorphous: IR (KBr) 1757, 1741, 1715 cm<sup>-1</sup>; HRMS (ES) *m/z* 747.4635 [(M+H)<sup>+</sup>; calcd for C<sub>37</sub>H<sub>67</sub>N<sub>2</sub>O<sub>13</sub>: 747.4643]. Anal. Calcd for C<sub>37</sub>H<sub>66</sub>N<sub>2</sub>O<sub>13</sub>·<sup>1</sup>/<sub>2</sub>H<sub>2</sub>O: C, 58.79; H, 8.93; N, 3.71. Found: C, 58.77; H, 8.92; N, 3.65.

**3-O-(N-Benzyloxycarbonyl)glycyl-5-O-desosaminyl-6-O-methylerythronolide A (3e).** The title compound was prepared from compound **4** (2.0 g, 3.17 mmol) and *N*-(tert-benzyloxycarbonyl)glycine (1.99 g, 9.52 mmol) by the same procedures as

described for **3b**. Purification by column chromatography gave 2.40 g (97%) of **3d** as colorless amorphous: IR (KBr) 1761, 1748, 1742, 1738, 1732, 1716, 1698  $\text{cm}^{-1}$ ; HRMS (ES)  $m/z$  781.4493 [(M+H)<sup>+</sup>; calcd for  $\text{C}_{40}\text{H}_{65}\text{N}_2\text{O}_{13}$ : 781.4487]. Anal. Calcd for  $\text{C}_{40}\text{H}_{64}\text{N}_2\text{O}_{13}$ : C, 61.52; H, 8.26; N, 3.59. Found: C, 61.32; H, 8.07; N, 3.54.

**5-O-Desosaminyl-3-O-glycyl-6-O-methylerythronolide A (3c)**. A mixture of **3e** (2.0 g, 2.56 mmol), 10% palladium carbon (0.4 g), and ammonium formate (1.6 g, 25.4 mmol) in MeOH (20 mL) was stirred at room temperature for 1.5h. The reaction mixture was passed through a celite pad, and the filtrate was concentrated in vacuo. The residue was purified by crystallization from ethyl acetate/ *n*-hexane to afford 0.95 g (50%) of **3c** as colorless powder: mp 187–190 °C; IR (KBr) 1745, 1738, 1725, 1698  $\text{cm}^{-1}$ ; HRMS (ES)  $m/z$  647.4122 [(M+H)<sup>+</sup>; calcd for  $\text{C}_{32}\text{H}_{59}\text{N}_2\text{O}_{11}$ : 647.4119]. Anal. Calcd for  $\text{C}_{32}\text{H}_{58}\text{N}_2\text{O}_{11}$ : C, 59.42; H, 9.04; N, 4.33. Found: C, 59.41; H, 9.11; N, 4.24.

**(E)-5-O-Desosaminyl-6-O-methylerythronolide A 9-O-(Phenylmethyl)oxime (5)**. A mixture of clarithromycin 9-oxime<sup>11</sup> and 2M aqueous hydrochloric acid (70 mL) was stirred at room temperature for 15h. The reaction mixture was washed with  $\text{CHCl}_3$ , and then was adjusted to pH10 with 2M NaOH solution. The solution was extracted with ethyl acetate and washed with brine. The organic layer was dried over  $\text{MgSO}_4$  and evaporated in vacuo. The residue was crystallized from 2-propanol to afford 2.55g (45%) of (*E*)-5-*O*-desosaminyl-6-*O*-methylerythronolide A 9-oxime. To a solution of the oxime (1.53 g, 2.52 mmol) in THF (30 mL) was added benzyl chloride (0.87 g, 6.87 mmol), powdered potassium hydroxide (0.34 g, 6.06 mmol), and tetra-*n*-butylammonium iodide (0.19 g, 0.51 mmol) at 0 °C. After stirring at room temperature for 22h, the reaction was quenched by addition of 50% dimethylamine solution and the reaction mixture was partitioned between ethyl acetate and water. The organic layer was washed with brine, dried over  $\text{MgSO}_4$  and evaporated in vacuo. The residue was purified by column chromatography eluting with  $\text{CHCl}_3$  / MeOH / 25%  $\text{NH}_4\text{OH}$  (21/ 1/ 0.1) to give 1.09 g (62%) of **5** as colorless amorphous, along with 0.53 g (27%) of 2'-*O*-phenylmethylated derivative of **5** as colorless amorphous: IR (KBr) 1735, 1630  $\text{cm}^{-1}$ ; HRMS (ES)  $m/z$  695.4485 [(M+H)<sup>+</sup>; calcd for  $\text{C}_{37}\text{H}_{63}\text{N}_2\text{O}_{10}$ : 695.4482]. Anal. Calcd for  $\text{C}_{37}\text{H}_{62}\text{N}_2\text{O}_{10}$ : C, 63.95; H, 8.99; N, 4.03. Found: C, 64.04; H, 9.06; N, 3.99.

**(E)-5-O-Desosaminyl-3-O-tetrahydropyranyl-6-O-methylerythronolide A 9-O-(phenylmethyl)oxime (7).** To a solution of **5** (1.09 g, 1.57 mmol) in acetone (20 mL) was added acetic anhydride (0.24 g, 2.35 mmol) at room temperature. After stirring at room temperature for 19h, the reaction mixture was partitioned between ethyl acetate and saturated NaHCO<sub>3</sub> solution. The organic layer was washed with brine, dried over MgSO<sub>4</sub> and evaporated in vacuo to afford 1.1 g of crude 2'-acetate **6**, which was used without further purification. To a solution of **6** in CH<sub>2</sub>Cl<sub>2</sub> (20 mL) was added 3,4-dihydro-2H-pyran (0.40 g, 4.76 mmol), *p*-toluenesulfonic acid monohydrate (0.45 g, 2.37 mmol), and molecular sieves 4A (2.0 g) at room temperature. After stirring at room temperature for 9h, the reaction mixture was filtered and the filtrate was partitioned between CHCl<sub>3</sub> and saturated NaHCO<sub>3</sub> solution. The organic layer was dried over MgSO<sub>4</sub> and evaporated in vacuo. The residue was dissolved in MeOH (20 mL) and the solution was stirred at room temperature for 20h. The reaction mixture was evaporated in vacuo, and the residue was purified by column chromatography eluting with MeOH/ CHCl<sub>3</sub>/ 25% NH<sub>4</sub>OH (15.5/ 1/ 0.1) to afford and 0.68 g (56%) of **7** as colorless amorphous, along with 179 mg (16%) of recovered starting material **5**.

**7:** IR (KBr) 1734, 1630 cm<sup>-1</sup>. HRMS (ES) *m/z* 779.5060 [(M+H)<sup>+</sup>; calcd for C<sub>42</sub>H<sub>71</sub>N<sub>2</sub>O<sub>11</sub>: 779.5058]. Anal. Calcd for C<sub>42</sub>H<sub>70</sub>N<sub>2</sub>O<sub>11</sub>: C, 64.76; H, 9.06; N, 3.60. Found: C, 64.68; H, 9.18; N, 3.54.

**3-O-(2-Tetrahydropyranyl)-5-O-desosaminyl-6-O-methylerythronolide A (3f).** A mixture of **7** (0.3 g, 0.39 mmol) and 10% palladium carbon (100 mg), ammonium formate (40 mg, 0.63 mmol), and 99% formic acid (0.12 mL, 3.13 mmol) in MeOH (3 mL) was stirred at 50 °C for 0.5h. After removal of the insoluble by filtration, evaporation of the solvent under reduced pressure afforded 244 mg of crude 3-O-(2-tetrahydropyranyl)-5-O-desosaminyl-6-O-methylerythronolide A 9-oxime. To a solution of the oxime (220 mg, 0.32 mmol) in EtOH (1 mL) and water (1.5 mL) was added sodium bisulfite (432 mg, 4.15 mmol), 99% formic acid (0.02 mL, 0.52 mmol). After refluxing for 30minutes, the mixture was adjusted to pH10 with 2M sodium hydroxide solution and extracted with ethyl acetate. The organic layer was dried over MgSO<sub>4</sub> and evaporated in vacuo. The residue was purified by column chromatography eluting with CHCl<sub>3</sub> / MeOH / 25% NH<sub>4</sub>OH (21/ 1/ 0.1) to give 130 mg (51%) of **3f** as colorless amorphous: IR (KBr) 1735, 1694 cm<sup>-1</sup>; HRMS (ES) *m/z* 674.4474 [(M+H)<sup>+</sup>; calcd for

C<sub>35</sub>H<sub>64</sub>NO<sub>11</sub>: 674.4479]. Anal. Calcd for C<sub>35</sub>H<sub>63</sub>NO<sub>11</sub>: C, 62.38; H, 9.42; N, 2.08. Found: C, 62.31; H, 9.43; N, 1.96.

**3-O-(2-Nitro)phenyl-5-O-desosaminyl-6-O-methylerythronolide A (3g).** To a solution of 1.18g (2.0 mmol) of **1** in THF (15 mL) was added 1-fluoro-2-nitrobenzene (2.1 mL, 20.0 mmol) and 60% sodium hydride (0.28 g, 17.0 mmol) at 0 °C, and the reaction mixture was allowed to warm to room temperature. After stirring for 24h, the reaction mixture was partitioned between ethyl acetate and brine. The organic layer was dried over MgSO<sub>4</sub> and evaporated in vacuo. The residue was purified by column chromatography eluting with CHCl<sub>3</sub> / MeOH / 25% NH<sub>4</sub>OH (95/ 5/ 0.5) to give 560mg (39%) of **3g** as slight yellow amorphous: IR (KBr) 1732, 1694 cm<sup>-1</sup>; HRMS (ES) *m/z* 711.4058 [(M+H)<sup>+</sup>; calcd for C<sub>36</sub>H<sub>59</sub>N<sub>2</sub>O<sub>12</sub>: 711.4068]. Anal. Calcd for C<sub>36</sub>H<sub>58</sub>N<sub>2</sub>O<sub>12</sub>·H<sub>2</sub>O: C, 59.32; H, 8.30; N, 3.84. Found: C, 59.02; H, 7.91; N, 3.70.

**3-O-Phenylacetyl-5-O-desosaminyl-6-O-methylerythronolide A (3h).** To a solution of **4** (1.26 g, 2.0 mmol) in pyridine (6.0 mL) was added 4-dimethylaminopyridine (122 mg, 1.0 mmol) and phenylacetyl chloride (0.66 mL, 5.0mmol) at 0 °C. After stirring at room temperature for 22 h, the reaction mixture was partitioned between ethyl acetate and brine. The organic layer was dried over MgSO<sub>4</sub> and evaporated in vacuo. The residue was purified by column chromatography eluting with acetone/ *n*-hexane/ Et<sub>3</sub>N (4/ 10/ 0.05) to give 730 mg (49%) of 2'-Ac-**3h**. This acetate was dissolved in methanol (10 mL) and the solution was refluxed for 6h, and then evaporated in vacuo. The residue was diluted with ethyl acetate and washed with saturated NaHCO<sub>3</sub> solution, brine successively, dried over MgSO<sub>4</sub> and evaporated in vacuo. The residue was purified by column chromatography eluting with CHCl<sub>3</sub> / MeOH / 25% NH<sub>4</sub>OH (20/ 1/ 0.1) to afford 490 mg (71%) of **3h** as slight yellow amorphous:IR (KBr) 1745, 1734, 1695cm<sup>-1</sup>; HRMS (ES) *m/z* 708.4308 [(M+H)<sup>+</sup>; calcd for C<sub>38</sub>H<sub>62</sub>NO<sub>11</sub>: 708.4323]. Anal. Calcd for C<sub>38</sub>H<sub>61</sub>NO<sub>11</sub>: C, 64.47; H, 8.69; N, 1.98. Found: C, 64.48; H, 8.76; N, 1.88.

**3-O-Benzylsulfonyl-5-O-desosaminyl-6-O-methylerythronolide A (3i).** To a solution of **4** (1.26 g, 2.0 mmol) in CH<sub>2</sub>Cl<sub>2</sub> (10 mL) and pyridine (2 mL) was added benzylsulfonyl chloride (953 mg, 5.0 mmol) at 0 °C. After stirring at room temperature for 23h, the reaction mixture was partitioned between ethyl acetate and saturated NaHCO<sub>3</sub> solution. The

organic layer was washed with saturated NH<sub>4</sub>Cl solution and brine successively, dried over MgSO<sub>4</sub> and evaporated in vacuo. The residue was purified by column chromatography eluting with acetone/ *n*-hexane/ Et<sub>3</sub>N (4/ 10/ 0.05) to give 1.37g (87%) of 2'-Ac-**3i** as colorless amorphous. The acetate (0.48 g, 0.61 mmol) was dissolved in MeOH (10 mL) and the solution was stirred at room temperature for 20.5h. After evaporation of the solvent, the residue was purified by column chromatography eluting with CHCl<sub>3</sub> / MeOH / 25% NH<sub>4</sub>OH (21/ 1/ 0.1) to afford 210mg (46%) of **3i** as colorless amorphous: IR (KBr) 1738, 1693 cm<sup>-1</sup>; HRMS (ES) *m/z* 744.3981 [(M+H)<sup>+</sup>; calcd for C<sub>50</sub>H<sub>54</sub>N<sub>3</sub>OS: 744.3988]. Anal. Calcd for C<sub>37</sub>H<sub>61</sub>NO<sub>12</sub>S·<sup>3</sup>/<sub>2</sub>H<sub>2</sub>O: C, 57.64; H, 8.37; N, 1.82. Found: C, 57.69; H, 8.04; N, 1.79.

**3-O-(4-Nitrophenyl)acetyl-5-O-desosaminyl-6-O-methylerythronolide A (3j).** 2'-Acetate of the title compound was prepared from compound **4** (5.0 g, 7.91 mmol) and 4-nitrophenylacetic acid (4.30 g, 23.7 mmol) by the same procedures as described for **3b**. Purification by column chromatography eluting with acetone/ *n*-hexane/ Et<sub>3</sub>N (6/ 10/ 0.2) afforded 5.03 g (80%) of 2'-*O*-acetyl-**3j** as light brown amorphous. A solution of this product in MeOH (50 mL) was stirred at room temperature for 15h, and evaporated in vacuo. The residue was crystallized from isopropylether to afford 3.86 g (81%) of **3j** as colorless powder: mp 157–159 °C; IR (KBr) 1742, 1732, 1694 cm<sup>-1</sup>; HRMS (ES) *m/z* 753.4189 [(M+H)<sup>+</sup>; calcd for C<sub>38</sub>H<sub>61</sub>N<sub>2</sub>O<sub>13</sub>: 753.4174]. Anal. Calcd for C<sub>38</sub>H<sub>60</sub>N<sub>2</sub>O<sub>13</sub>·<sup>1</sup>/<sub>2</sub>H<sub>2</sub>O: C, 59.90; H, 8.07; N, 3.68. Found: C, 59.79; H, 7.97; N, 3.70.

**3-O-(4-Nitro)benzoyl-5-O-desosaminyl-6-O-methylerythronolide A (3k).** 2'-Acetate of the title compound was prepared from compound **4** (5.0 g, 7.91 mmol) and 4-nitrobenzoic acid (3.97 g, 23.7 mmol) by the same procedures as described for **3b**. Purification of the crude product by column chromatography eluting with acetone/ *n*-hexane/ Et<sub>3</sub>N (6/ 10/ 0.2) afforded to 6.03 g (98%) of 2'-Ac-**3k** as slight yellow amorphous. This product in MeOH (50 mL) was stirred at room temperature for 15h, and evaporated in vacuo. The residue was purified by column chromatography eluting with acetone/ *n*-hexane/ Et<sub>3</sub>N (6/ 10/ 0.2) to afford 5.25 g (92%) of **3i** as slight yellow amorphous: IR (KBr) 1740, 1694, 1610 cm<sup>-1</sup>; HRMS (ES) *m/z* 739.4006 [(M+H)<sup>+</sup>; calcd for C<sub>37</sub>H<sub>59</sub>N<sub>2</sub>O<sub>13</sub>: 739.4017]. Anal. Calcd for C<sub>37</sub>H<sub>58</sub>N<sub>2</sub>O<sub>13</sub>: C, 60.15; H, 7.91; N, 3.79. Found: C, 60.05; H, 8.03; N, 3.63.

D:\Tarakawa\journal\TES0313  
 TES0313...1H-NMR/TEMING06

DEFILE  
 C0001  
 NAME  
 DATE  
 OPERATOR  
 EXMNO  
 OBSER  
 OBSER  
 POINT  
 POINT  
 STAGE  
 ACQUM  
 PD  
 PUL  
 IPRUC  
 CTEMP  
 SLOMT  
 EXERT  
 RF  
 RGAIN

SINGLE-PHOS LOROR 6.4.1  
 500.00 MHz  
 160.00 MHz  
 2410.0 Hz  
 16284  
 10000.0 Hz  
 %  
 1.638 sec  
 4.362 sec  
 5.9 us  
 1H  
 24.7 c  
 CDCL3  
 0.00 ppm  
 1.00 Hz  
 17

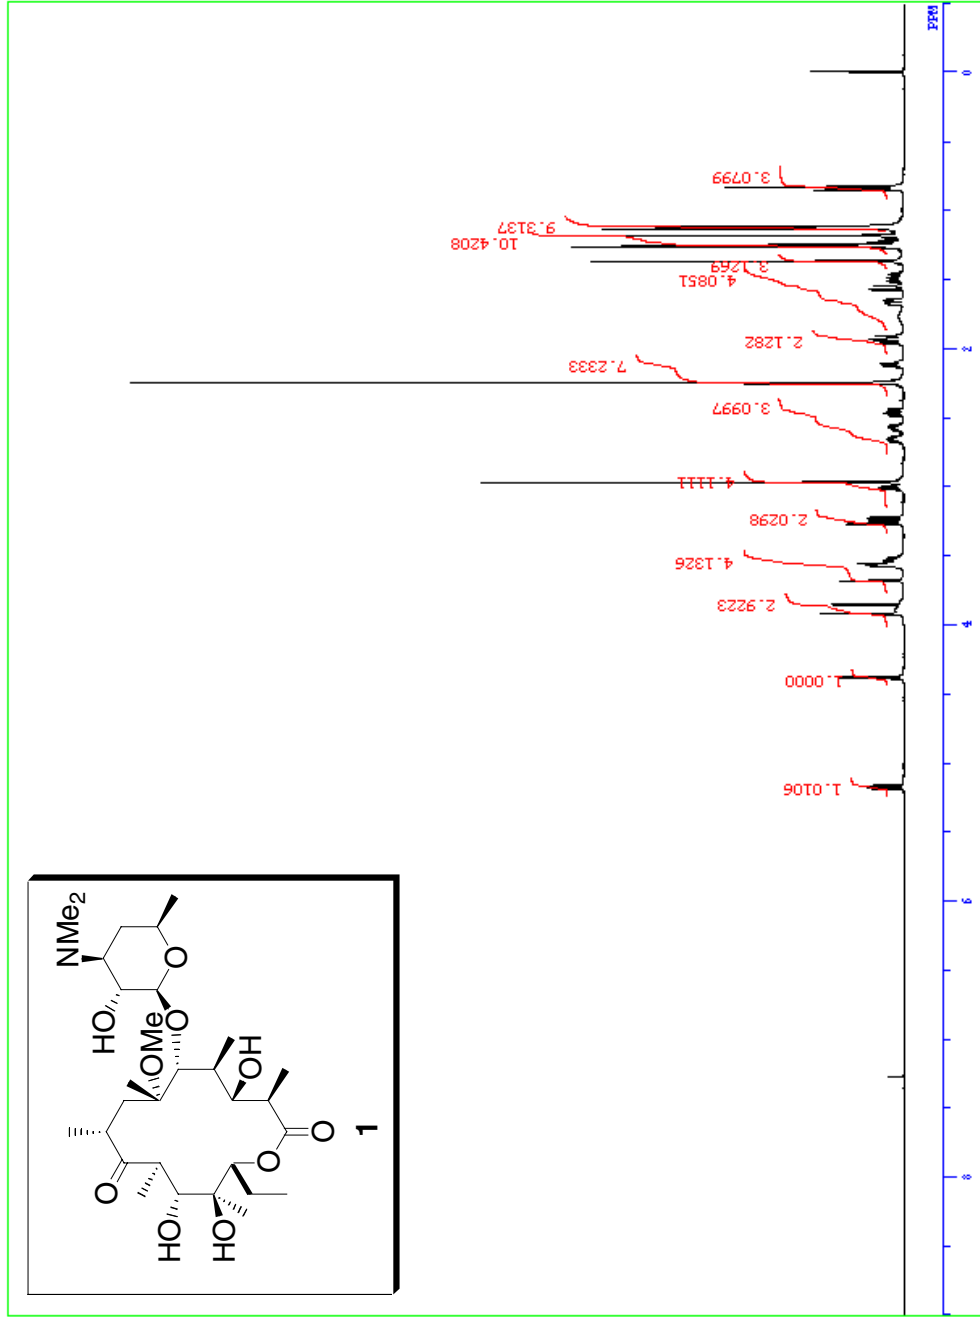



**Table 1.** Proton and carbon assignments of compound **1**.

| 500MHz <sup>1</sup> H NMR data    |                |      |                     | 75MHz <sup>13</sup> C NMR data    |                |
|-----------------------------------|----------------|------|---------------------|-----------------------------------|----------------|
|                                   | $\delta$ (ppm) | peak | <i>J</i> (Hz)       |                                   | $\delta$ (ppm) |
| C <sub>2</sub> -H                 | 2.66           | m    | -                   | C <sub>1</sub>                    | 175.0          |
| 2-Me                              | 1.26           | m    | -                   | C <sub>2</sub>                    | 44.6           |
| C <sub>3</sub> -H                 | 3.50 - 3.58    | m    | -                   | C <sub>2</sub> -Me                | 15.2           |
| C <sub>4</sub> -H                 | 2.12           | dq   | 7.3                 | C <sub>3</sub>                    | 79.0           |
| 4-Me                              | 1.13           | m    | -                   | C <sub>4</sub>                    | 35.9           |
| C <sub>5</sub> -H                 | 3.69           | d    | 1.8                 | C <sub>4</sub> -Me                | 8.2            |
| 6-Me                              | 1.37           | s    | -                   | C <sub>5</sub>                    | 88.5           |
| 6-OMe                             | 2.97           | s    | -                   | C <sub>6</sub>                    | 78.0           |
| C <sub>7</sub> -H                 | 1.56           | dd   | 4.6, 1.8            | C <sub>6</sub> -Me                | 18.8           |
|                                   | 1.90 - 1.96    | m    | -                   | C <sub>6</sub> -OMe               | 49.5           |
| C <sub>8</sub> -H                 | 2.58           | m    | -                   | C <sub>7</sub>                    | 38.7           |
| 8-Me                              | 1.13           | m    | -                   | C <sub>8</sub>                    | 45.5           |
| C <sub>10</sub> -H                | 3.01           | m    | -                   | C <sub>8</sub> -Me                | 17.7           |
| 10-Me                             | 1.13           | m    | -                   | C <sub>9</sub>                    | 220.7          |
| C <sub>11</sub> -H                | 3.86           | d    | 1.2                 | C <sub>10</sub>                   | 37.5           |
| 12-Me                             | 1.18           | s    | -                   | C <sub>10</sub> -Me               | 12.6           |
| C <sub>13</sub> -H                | 5.18           | dd   | 11.0, 2.4           | C <sub>11</sub>                   | 69.8           |
| C <sub>14</sub> -H                | 1.49           | m    | -                   | C <sub>12</sub>                   | 74.2           |
|                                   | 1.90 - 1.96    | m    | -                   | C <sub>12</sub> -Me               | 16.2           |
| C <sub>15</sub> -H                | 0.84           | t    | 7.6                 | C <sub>13</sub>                   | 76.6           |
| C <sub>1</sub> '-H                | 4.38           | d    | 7.3                 | C <sub>14</sub>                   | 21.4           |
| C <sub>2</sub> '-H                | 3.24           | dd   | 10.4, 7.3           | C <sub>15</sub>                   | 10.4           |
| C <sub>3</sub> '-H                | 2.47           | ddd  | 12.2, 10.4, 4.3     | C <sub>1</sub> '                  | 106.8          |
| C <sub>3</sub> '-NMe <sub>2</sub> | 2.25           | s    | -                   | C <sub>2</sub> '                  | 70.7           |
| C <sub>4</sub> '-H                | 1.20 - 1.28    | m    | -                   | C <sub>3</sub> '                  | 65.7           |
|                                   | 1.67           | dq   | 12.2, 1.8, 1.8, 1.8 | C <sub>3</sub> '-NMe <sub>2</sub> | 40.2           |
| C <sub>5</sub> '                  | 3.50 - 3.58    | m    | -                   | C <sub>4</sub> '                  | 28.0           |
| C <sub>5</sub> '-Me               | 1.26           | m    | -                   | C <sub>5</sub> '                  | 70.3           |
| OH                                | 3.27           | s    | -                   | C <sub>5</sub> '-Me               | 21.2           |
|                                   | 3.50 - 3.58    | m    | -                   |                                   |                |
|                                   | 3.89           | br   | -                   |                                   |                |
|                                   | 3.92           | s    | -                   |                                   |                |

D:\Tarakawa\journal\201054  
 20-1054...1H-NMR/TEMK006

DEFILE  
 COMMENT  
 DATE  
 NAME  
 EXMNO LOROR  
 ORMO 500.00 MHz  
 ORMO 160.00 MHz  
 ORFM 2410.0 Hz  
 POINT 16384  
 FREQ0 10000.0 Hz  
 STANG 0  
 ACQU 1.638 sec  
 PD 4.362 sec  
 PUL 5.9 us  
 IPRUC LH  
 CTEMP 25.6 c  
 CDCL3  
 SLOMT 0.00 ppm  
 EXERT 1.00 Hz  
 RF 1.00 Hz  
 RGAIN 16

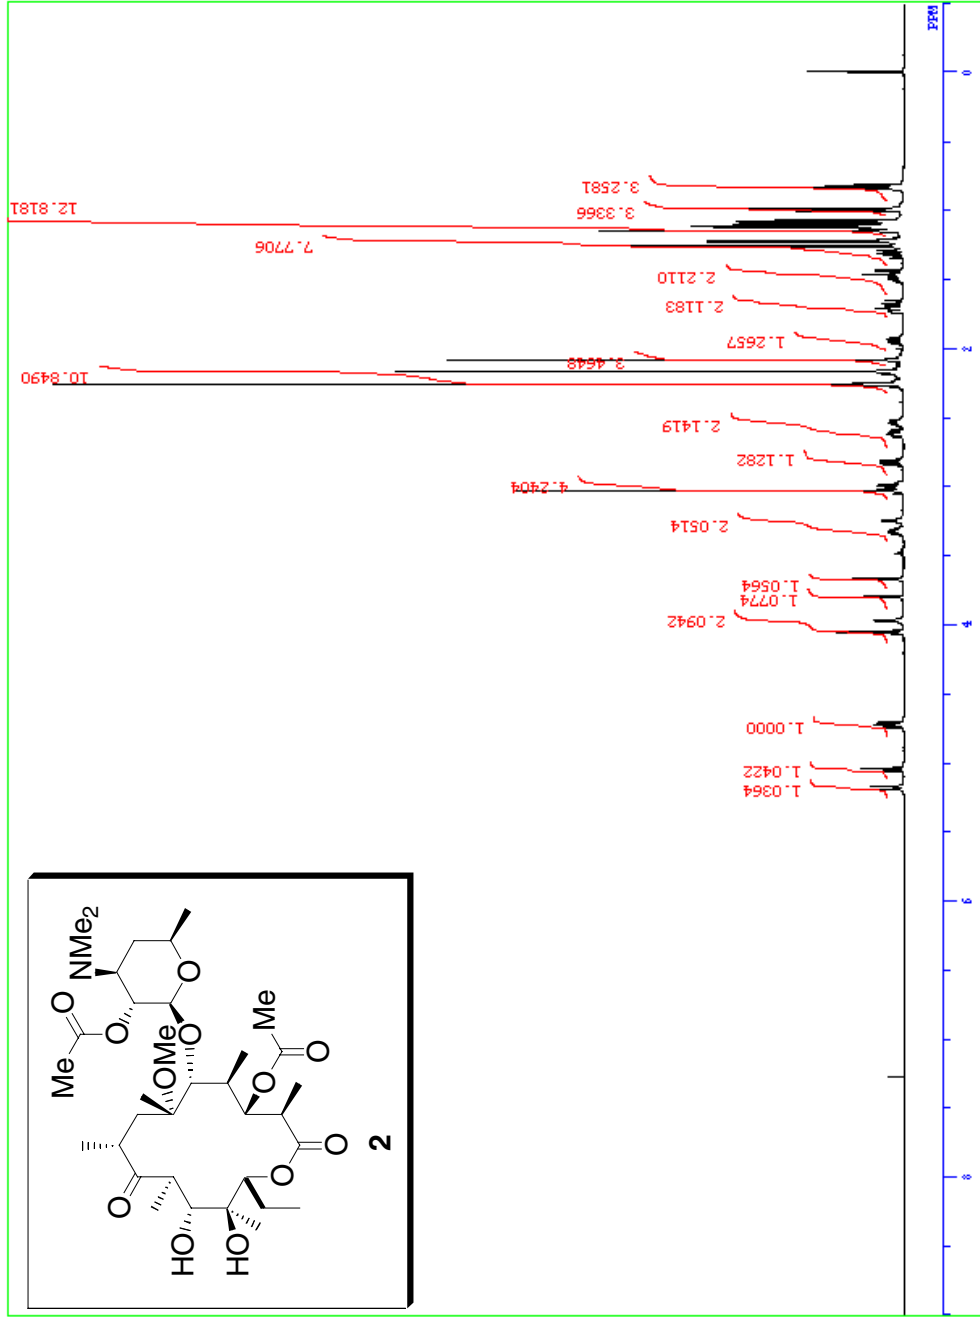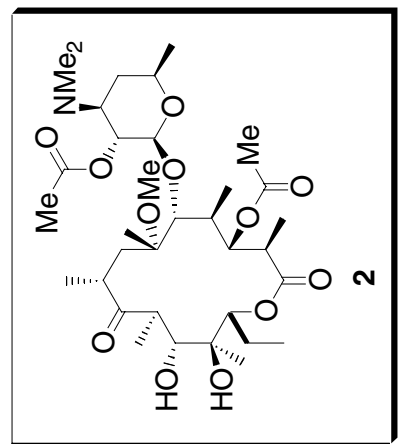

**Table 2.** Proton and carbon assignments of compound **2**.

| 500MHz <sup>1</sup> H NMR data     |                |      |               | 75MHz <sup>13</sup> C NMR data     |                |
|------------------------------------|----------------|------|---------------|------------------------------------|----------------|
|                                    | $\delta$ (ppm) | peak | <i>J</i> (Hz) |                                    | $\delta$ (ppm) |
| C <sub>2</sub> -H                  | 2.83           | m    | -             | C <sub>1</sub>                     | 173.6          |
| 2-Me                               | 1.08           | d    | 6.7           | C <sub>2</sub>                     | 42.7           |
| C <sub>3</sub> -H                  | 5.05           | d    | 11.0          | C <sub>2</sub> -Me                 | 15.2           |
| C <sub>4</sub> -H                  | 2.21 - 2.14    | m    | -             | C <sub>3</sub>                     | 77.8           |
| 4-Me                               | 0.99           | d    | 7.3           | C <sub>4</sub>                     | 35.8           |
| C <sub>5</sub> -H                  | 3.67           | d    | 3.1           | C <sub>4</sub> -Me                 | 8.7            |
| 6-Me                               | 1.26           | s    | -             | C <sub>5</sub>                     | 79.8           |
| 6-OMe                              | 3.03           | s    | -             | C <sub>6</sub>                     | 77.9           |
| C <sub>7</sub> -H                  | 1.66 - 1.74    | m    | -             | C <sub>6</sub> -Me                 | 19.3           |
|                                    | 1.45           | dd   | 14.7, 1.2     | C <sub>6</sub> -OMe                | 50.1           |
| C <sub>8</sub> -H                  | 2.54           | m    | -             | C <sub>7</sub>                     | 38.3           |
| 8-Me                               | 1.11           | d    | 7.3           | C <sub>8</sub>                     | 45.3           |
| C <sub>10</sub> -H                 | 2.99           | m    | -             | C <sub>8</sub> -Me                 | 17.9           |
| 10-Me                              | 1.12           | d    | 6.7           | C <sub>9</sub>                     | 220.7          |
| C <sub>11</sub> -H                 | 3.80           | d    | 1.2           | C <sub>10</sub>                    | 37.3           |
| 12-Me                              | 1.15           | s    | -             | C <sub>10</sub> -Me                | 12.5           |
| C <sub>13</sub> -H                 | 5.18           | dd   | 11.0, 2.4     | C <sub>11</sub>                    | 69.5           |
| C <sub>14</sub> -H                 | 1.94           | m    | -             | C <sub>12</sub>                    | 74.2           |
|                                    | 1.46 - 1.52    | m    | -             | C <sub>12</sub> -Me                | 16.1           |
| C <sub>15</sub> -H                 | 0.83           | t    | 7.3           | C <sub>13</sub>                    | 77.0           |
| C <sub>1</sub> '-H                 | 4.06           | d    | 7.3           | C <sub>14</sub>                    | 21.2           |
| C <sub>2</sub> '-H                 | 4.73           | dd   | 10.4, 7.3     | C <sub>15</sub>                    | 10.4           |
| C <sub>3</sub> '-H                 | 2.62           | m    | -             | C <sub>1</sub> '                   | 100.6          |
| C <sub>3</sub> '-NMe <sub>2</sub>  | 2.26           | m    | -             | C <sub>2</sub> '                   | 71.3           |
| C <sub>4</sub> '-H                 | 1.66 - 1.74    | m    | -             | C <sub>3</sub> '                   | 63.5           |
|                                    | 1.27 - 1.34    | m    | -             | C <sub>3</sub> '-NMe <sub>2</sub>  | 40.6           |
| C <sub>5</sub> '                   | 3.33           | m    | -             | C <sub>4</sub> '                   | 30.7           |
| C <sub>5</sub> '-Me                | 1.23           | d    | 6.1           | C <sub>5</sub> '                   | 69.3           |
| OH                                 | 3.25           | br   | -             | C <sub>5</sub> '-Me                | 20.9           |
|                                    | 3.97           | br   | -             | C <sub>3</sub> '-COCH <sub>3</sub> | 21.2           |
| C <sub>2</sub> '-COCH <sub>3</sub> | 2.08           | s    | -             | C <sub>2</sub> '-COCH <sub>3</sub> | 21.4           |
| C <sub>3</sub> -COCH <sub>3</sub>  | 2.17           | s    | -             | C <sub>2</sub> '-COCH <sub>3</sub> | 169.8          |
|                                    |                |      |               | C <sub>3</sub> '-COCH <sub>3</sub> | 170.2          |

D:\Tarakawa\journal\TES0850  
 TES0850...1H-NMR/TEMK20A

NAME  
 DATE  
 EXMOC  
 OSMOC  
 OSMET  
 OSMIN  
 POINT  
 FREQ0  
 STANG  
 ACQIN  
 PD  
 PUL  
 IEROC  
 CTEMP  
 SLOMT  
 EXERT  
 BF  
 RGAIN

NAME  
 DATE  
 EXMOC  
 OSMOC  
 OSMET  
 OSMIN  
 POINT  
 FREQ0  
 STANG  
 ACQIN  
 PD  
 PUL  
 IEROC  
 CTEMP  
 SLOMT  
 EXERT  
 BF  
 RGAIN

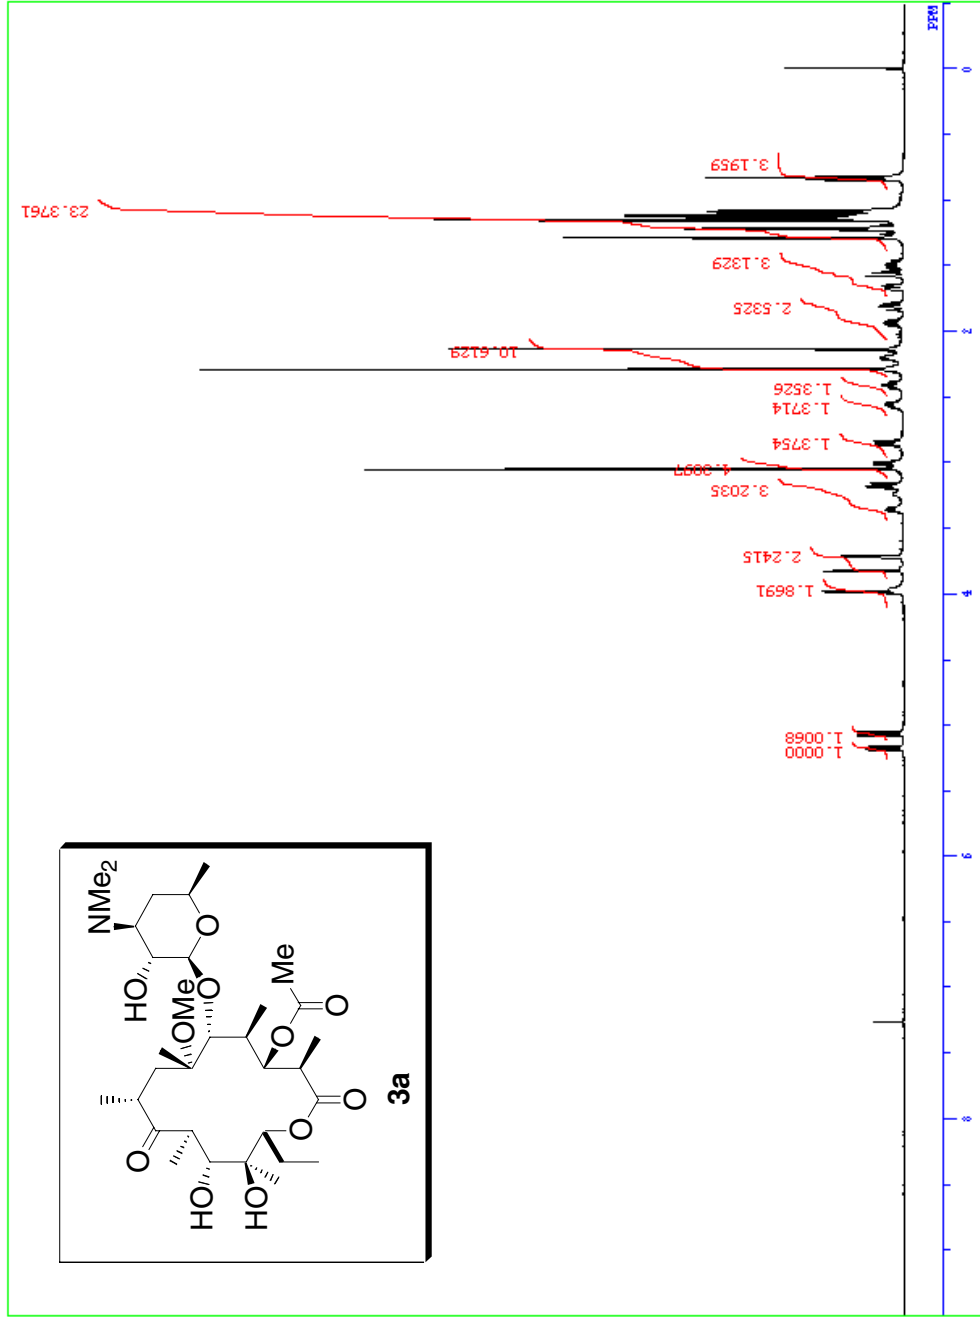

**Table 3.** Proton and carbon assignments of compound **3a**.

| 500MHz <sup>1</sup> H NMR data    |                |      |                     | 75MHz <sup>13</sup> C NMR data    |                |
|-----------------------------------|----------------|------|---------------------|-----------------------------------|----------------|
|                                   | $\delta$ (ppm) | peak | <i>J</i> (Hz)       |                                   | $\delta$ (ppm) |
| C <sub>2</sub> -H                 | 2.86           | m    | -                   | C <sub>1</sub>                    | 173.7          |
| 2-Me                              | 1.08           | d    | 6.7                 | C <sub>2</sub>                    | 42.8           |
| C <sub>3</sub> -H                 | 5.07           | d    | 11.0                | C <sub>2</sub> -Me                | 15.2           |
| C <sub>4</sub> -H                 | 2.21           | m    | -                   | C <sub>3</sub>                    | 77.9           |
| 4-Me                              | 1.15           | d    | 7.9                 | C <sub>4</sub>                    | 36.0           |
| C <sub>5</sub> -H                 | 3.72           | d    | 3.1                 | C <sub>4</sub> -Me                | 8.9            |
| 6-Me                              | 1.29           | s    | -                   | C <sub>5</sub>                    | 80.9           |
| 6-OMe                             | 3.05           | s    | -                   | C <sub>6</sub>                    | 77.9           |
| C <sub>7</sub> -H                 | 1.57           | dd   | 14.7, 11.6          | C <sub>6</sub> -Me                | 19.3           |
|                                   | 1.81           | dd   | 14.7, 1.2           | C <sub>6</sub> -OMe               | 50.2           |
| C <sub>8</sub> -H                 | 2.56           | m    | -                   | C <sub>7</sub>                    | 38.7           |
| 8-Me                              | 1.11           | d    | 7.3                 | C <sub>8</sub>                    | 45.4           |
| C <sub>10</sub> -H                | 3.01           | m    | -                   | C <sub>8</sub> -Me                | 18.0           |
| 10-Me                             | 1.13           | d    | 7.3                 | C <sub>9</sub>                    | 220.7          |
| C <sub>11</sub> -H                | 3.83           | d    | 1.2                 | C <sub>10</sub>                   | 37.3           |
| 12-Me                             | 1.16           | s    | -                   | C <sub>10</sub> -Me               | 12.5           |
| C <sub>13</sub> -H                | 5.18           | dd   | 11.0, 1.8           | C <sub>11</sub>                   | 69.5           |
| C <sub>14</sub> -H                | 1.50           | m    | -                   | C <sub>12</sub>                   | 74.2           |
|                                   | 1.94           | m    | -                   | C <sub>12</sub> -Me               | 16.1           |
| C <sub>15</sub> -H                | 0.84           | t    | 7.3                 | C <sub>13</sub>                   | 77.0           |
| C <sub>1</sub> '-H                | 3.99           | d    | 7.3                 | C <sub>14</sub>                   | 21.2           |
| C <sub>2</sub> '-H                | 3.18           | dd   | 7.3                 | C <sub>15</sub>                   | 10.4           |
| C <sub>3</sub> '-H                | 2.41           | m    | -                   | C <sub>1</sub> '                  | 103.1          |
| C <sub>3</sub> '-NMe <sub>2</sub> | 2.29           | s    | -                   | C <sub>2</sub> '                  | 70.4           |
| C <sub>4</sub> '-H                | 1.16 – 1.23    | m    | -                   | C <sub>3</sub> '                  | 66.1           |
|                                   | 1.67           | dq   | 12.2, 1.8, 1.8, 1.8 | C <sub>3</sub> '-NMe <sub>2</sub> | 40.3           |
| C <sub>5</sub> '                  | 3.36           | m    | -                   | C <sub>4</sub> '                  | 28.5           |
| C <sub>5</sub> '-Me               | 1.22           | d    | 6.1                 | C <sub>5</sub> '                  | 69.7           |
| OH                                | 3.24           | br   | -                   | C <sub>5</sub> '-Me               | 21.1           |
|                                   | 3.97           | br   | -                   | C <sub>3</sub> -COCH              | 21.3           |
| C <sub>3</sub> -COCH <sub>3</sub> | 2.14           | s    | -                   | C <sub>3</sub> -COCH              | 170.5          |

D:\Tarakawa\journal\TES0905  
 TES0905-50L...1H-NMR(TEMIKY)

DEFILE  
 COMMENT  
 NAME  
 INSTR  
 EXMOC  
 ORMOC  
 ORPRO  
 ORSOL  
 ORSOL  
 POINT  
 FREQ0  
 STANG  
 ACQIN  
 PD  
 PUL  
 IPRUC  
 CTEMP  
 SLOWT  
 EXERT  
 RF  
 RGAIN

1H  
 SINGLE-PW  
 100000.0 Hz  
 500.00 MHz  
 160.00 MHz  
 2410.0 Hz  
 16284  
 100000.0 Hz  
 %  
 1.638 sec  
 4.362 sec  
 5.9 us  
 1H  
 26.0 c  
 CDCL3  
 0.00 ppm  
 1.00 Hz  
 16

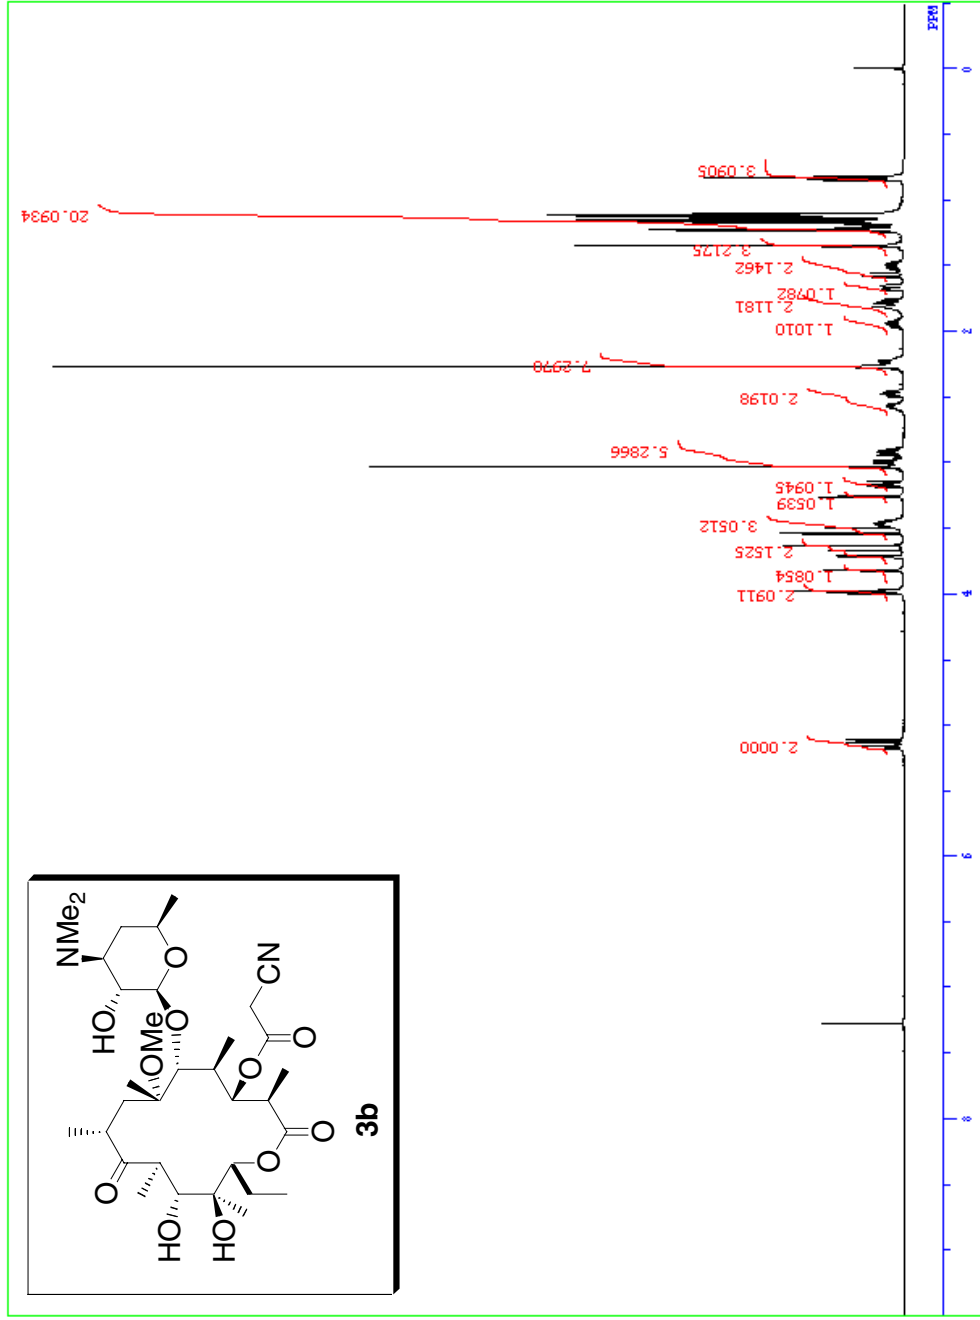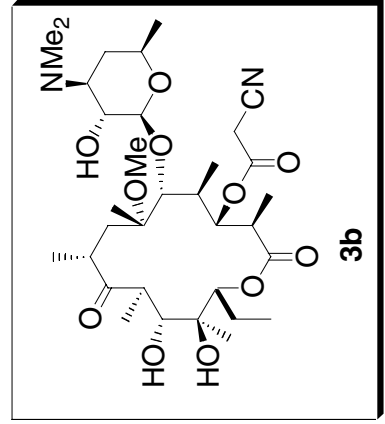

**Table 4.** Proton and carbon assignments of compound **3b**.

| 500MHz <sup>1</sup> H NMR data       |                |      |                     | 75MHz <sup>13</sup> C NMR data       |                |
|--------------------------------------|----------------|------|---------------------|--------------------------------------|----------------|
|                                      | $\delta$ (ppm) | peak | <i>J</i> (Hz)       |                                      | $\delta$ (ppm) |
| C <sub>2</sub> -H                    | 2.93           | m    | -                   | C <sub>1</sub>                       | 173.1          |
| 2-Me                                 | 1.11           | d    | 7.3                 | C <sub>2</sub>                       | 42.7           |
| C <sub>3</sub> -H                    | 5.13           | d    | 11.0                | C <sub>2</sub> -Me                   | 15.2           |
| C <sub>4</sub> -H                    | 2.23           | m    | -                   | C <sub>3</sub>                       | 81.7           |
| 4-Me                                 | 1.17           | d    | 7.3                 | C <sub>4</sub>                       | 36.4           |
| C <sub>5</sub> -H                    | 3.72           | d    | 3.1                 | C <sub>4</sub> -Me                   | 8.8            |
| 6-Me                                 | 1.35           | s    | -                   | C <sub>5</sub>                       | 84.3           |
| 6-OMe                                | 3.04           | s    | -                   | C <sub>6</sub>                       | 78.0           |
| C <sub>7</sub> -H                    | 1.79           | dd   | 14.7, 11.6          | C <sub>6</sub> -Me                   | 19.4           |
|                                      | 1.57           | dd   | 14.7, 1.8           | C <sub>6</sub> -OMe                  | 49.9           |
| C <sub>8</sub> -H                    | 2.57           | m    | -                   | C <sub>7</sub>                       | 38.7           |
| 8-Me                                 | 1.12           | d    | 7.3                 | C <sub>8</sub>                       | 45.2           |
| C <sub>10</sub> -H                   | 3.00           | m    | -                   | C <sub>8</sub> -Me                   | 17.8           |
| 10-Me                                | 1.13           | d    | 7.3                 | C <sub>9</sub>                       | 220.6          |
| C <sub>11</sub> -H                   | 3.82           | d    | 1.2                 | C <sub>10</sub>                      | 37.3           |
| 12-Me                                | 1.16           | s    | -                   | C <sub>10</sub> -Me                  | 12.4           |
| C <sub>13</sub> -H                   | 5.18           | dd   | 11.0, 2.4           | C <sub>11</sub>                      | 69.5           |
| C <sub>14</sub> -H                   | 1.95           | m    | -                   | C <sub>12</sub>                      | 74.1           |
|                                      | 1.50           | m    | -                   | C <sub>12</sub> -Me                  | 16.1           |
| C <sub>15</sub> -H                   | 0.84           | t    | 7.3                 | C <sub>13</sub>                      | 77.4           |
| C <sub>1</sub> '-H                   | 3.99           | d    | 7.3                 | C <sub>14</sub>                      | 21.1           |
| C <sub>2</sub> '-H                   | 3.17           | dd   | 10.4, 7.3           | C <sub>15</sub>                      | 10.4           |
| C <sub>3</sub> '-H                   | 2.48           | m    | -                   | C <sub>1</sub> '                     | 105.1          |
| C <sub>3</sub> '-NMe <sub>2</sub>    | 2.27           | s    | -                   | C <sub>2</sub> '                     | 70.4           |
| C <sub>4</sub> '-H                   | 1.20 – 1.25    | m    | -                   | C <sub>3</sub> '                     | 65.9           |
|                                      | 1.67           | dq   | 12.8, 1.8, 1.8, 1.8 | C <sub>3</sub> '-NMe <sub>2</sub>    | 40.3           |
| C <sub>5</sub> '                     | 3.48           | m    | -                   | C <sub>4</sub> '                     | 28.1           |
| C <sub>5</sub> '-Me                  | 1.23           | d    | 6.1                 | C <sub>5</sub> '                     | 69.9           |
| OH                                   | 3.26           | s    | -                   | C <sub>5</sub> '-Me                  | 21.1           |
|                                      | 3.98           | s    | -                   | C <sub>3</sub> -COCH <sub>2</sub> CN | 25.0           |
| C <sub>3</sub> -COCH <sub>2</sub> CN | 3.52           | d    | 18.9                | C <sub>3</sub> -COCH <sub>2</sub> CN | 113.1          |
|                                      | 3.65           | d    | 18.9                | C <sub>3</sub> -COCH <sub>2</sub> CN | 163.4          |

D:\Tarikawa\journal\TES0836  
 TES0836:lh-rwr  
 DATE: Thu Jun 21 10:55:28 2001  
 LH  
 EXM00D non  
 OBTRO 499.10 MHz  
 OESIT 120.00 MHz  
 OEFIN 8250.0 Hz  
 POINT 32768  
 FREQ00 99800.0 Hz  
 STANG 0  
 ACQTM 3.283 sec  
 PD 3.000 sec  
 PUL 6.4 us  
 IPRUC LH  
 CTEMP 24.7 c  
 CDCL3  
 SLOWT 0.00 ppm  
 EXERT 1.00 Hz  
 RGAIN 15

DEFILE  
 COMMENT  
 DATE  
 EXM00D  
 OBTRO  
 OESIT  
 OEFIN  
 POINT  
 FREQ00  
 STANG  
 ACQTM  
 PD  
 PUL  
 IPRUC  
 CTEMP  
 SLOWT  
 EXERT  
 RGAIN

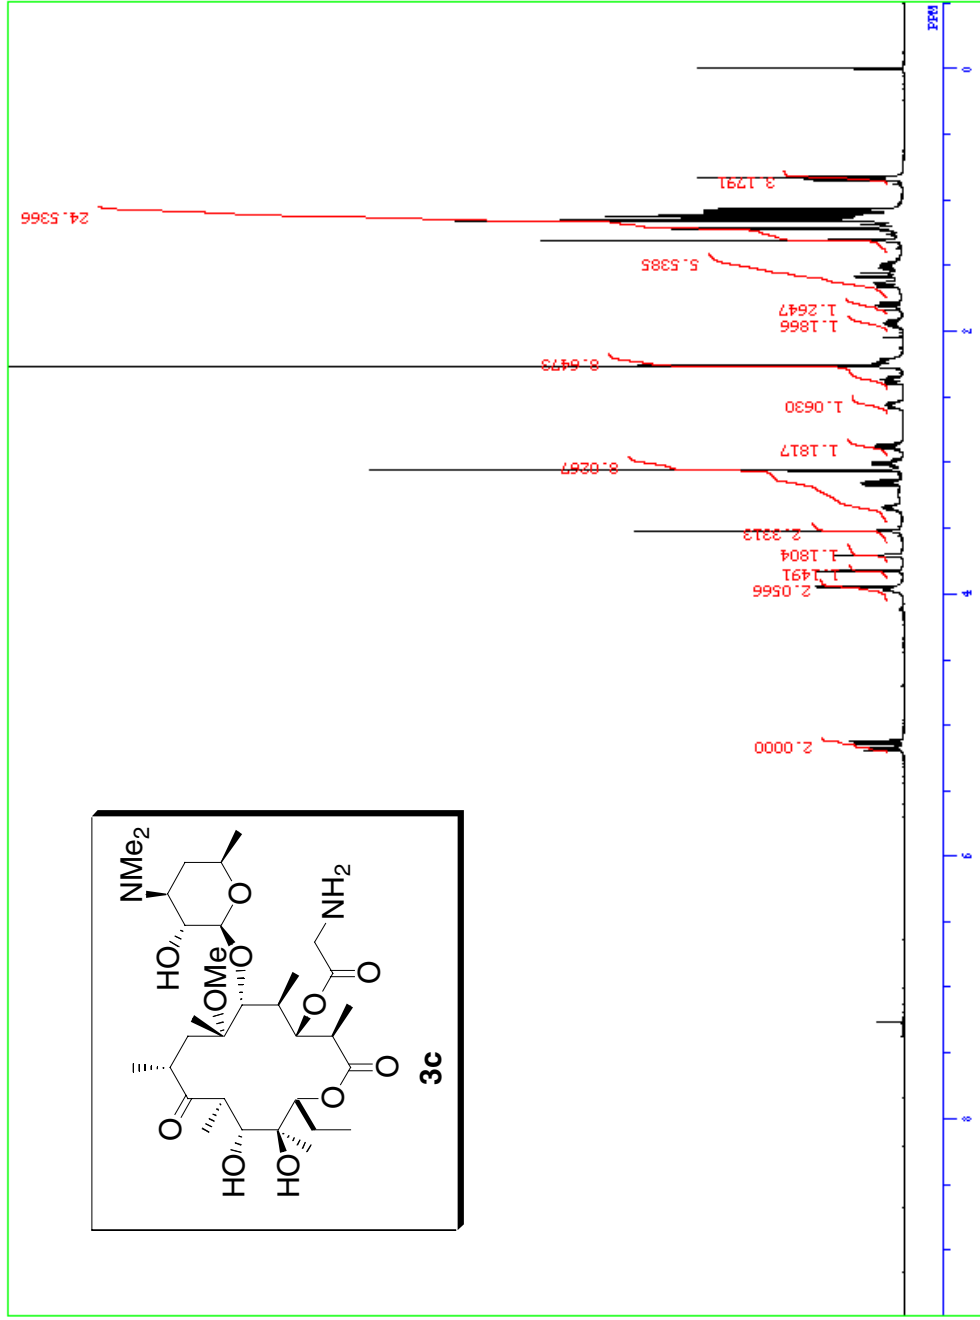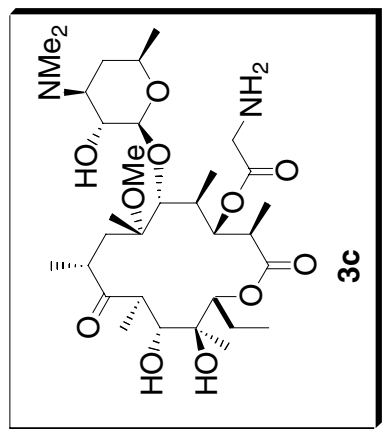



**Table 5.** Proton and carbon assignments of compound **3c**.

| 500MHz <sup>1</sup> H NMR data                    |                |      |                     | 75MHz <sup>13</sup> C NMR data       |                |
|---------------------------------------------------|----------------|------|---------------------|--------------------------------------|----------------|
|                                                   | $\delta$ (ppm) | peak | <i>J</i> (Hz)       |                                      | $\delta$ (ppm) |
| C <sub>2</sub> -H                                 | 2.88           | m    | -                   | C <sub>1</sub>                       | 173.6          |
| 2-Me                                              | 1.08           | d    | 6.7                 | C <sub>2</sub>                       | 42.8           |
| C <sub>3</sub> -H                                 | 5.13           | d    | 11.0                | C <sub>2</sub> -Me                   | 15.2           |
| C <sub>4</sub> -H                                 | 2.20 – 2.27    | m    | -                   | C <sub>3</sub>                       | 78.7           |
| 4-Me                                              | 1.15           | d    | 6.1                 | C <sub>4</sub>                       | 36.2           |
| C <sub>5</sub> -H                                 | 3.71           | d    | 3.4                 | C <sub>4</sub> -Me                   | 8.9            |
| 6-Me                                              | 1.31           | s    | -                   | C <sub>5</sub>                       | 81.8           |
| 6-OMe                                             | 3.06           | s    | -                   | C <sub>6</sub>                       | 78.0           |
| C <sub>7</sub> -H                                 | 1.81           | dd   | 14.6, 11.9          | C <sub>6</sub> -Me                   | 19.3           |
|                                                   | 1.57           | dd   | 14.6, 1.5           | C <sub>6</sub> -OMe                  | 50.1           |
| C <sub>8</sub> -H                                 | 2.57           | m    | -                   | C <sub>7</sub>                       | 38.7           |
| 8-Me                                              | 1.12           | d    | 7.9                 | C <sub>8</sub>                       | 45.4           |
| C <sub>10</sub> -H                                | 3.01           | m    | -                   | C <sub>8</sub> -Me                   | 17.9           |
| 10-Me                                             | 1.13           | d    | 7.0                 | C <sub>9</sub>                       | 220.6          |
| C <sub>11</sub> -H                                | 3.83           | d    | 1.5                 | C <sub>10</sub>                      | 37.3           |
| 12-Me                                             | 1.16           | s    | -                   | C <sub>10</sub> -Me                  | 12.5           |
| C <sub>13</sub> -H                                | 5.19           | dd   | 11.3, 2.1           | C <sub>11</sub>                      | 69.5           |
| C <sub>14</sub> -H                                | 1.95           | m    | -                   | C <sub>12</sub>                      | 74.2           |
|                                                   | 1.50           | m    | -                   | C <sub>12</sub> -Me                  | 16.1           |
| C <sub>15</sub> -H                                | 0.84           | t    | 7.3                 | C <sub>13</sub>                      | 77.1           |
| C <sub>1</sub> '-H                                | 3.95           | d    | 7.3                 | C <sub>14</sub>                      | 21.2           |
| C <sub>2</sub> '-H                                | 3.16           | dd   | 10.4, 7.3           | C <sub>15</sub>                      | 10.4           |
| C <sub>3</sub> '-H                                | 2.37           | m    | -                   | C <sub>1</sub> '                     | 103.7          |
| C <sub>3</sub> '-NMe <sub>2</sub>                 | 2.27           | s    | -                   | C <sub>2</sub> '                     | 70.4           |
| C <sub>4</sub> '-H                                | 1.16 – 1.19    | m    | -                   | C <sub>3</sub> '                     | 66.1           |
|                                                   | 1.65           | dq   | 12.8, 1.8, 1.8, 1.8 | C <sub>3</sub> '-NMe <sub>2</sub>    | 40.3           |
| C <sub>5</sub> '                                  | 3.35           | m    | -                   | C <sub>4</sub> '                     | 28.4           |
| C <sub>5</sub> '-Me                               | 1.22           | d    | 6.1                 | C <sub>5</sub> '                     | 69.8           |
| C <sub>3</sub> -COCH <sub>2</sub> NH <sub>2</sub> | 3.53           | s    | -                   | C <sub>5</sub> '-Me                  | 21.2           |
| OH                                                | 3.98           | br   | -                   | C <sub>3</sub> -COCH <sub>2</sub> NH | 44.3           |
|                                                   |                |      |                     | C <sub>3</sub> -COCH <sub>2</sub> NH | 174.0          |

D:\Tarakawa\journal\TES0824  
 TES0824...1H-NMR/TEMING08

NAME  
 INSTRUM  
 EXM400  
 OPEROR  
 OBSERV  
 OBSERV  
 POINT  
 FREQ00  
 STANG  
 ACQUM  
 PD  
 PUL  
 IERNUC  
 CTEMP  
 SLOMT  
 EXERT  
 RF  
 RGAIN

NAME  
 INSTRUM  
 EXM400  
 OPEROR  
 OBSERV  
 OBSERV  
 POINT  
 FREQ00  
 STANG  
 ACQUM  
 PD  
 PUL  
 IERNUC  
 CTEMP  
 SLOMT  
 EXERT  
 RF  
 RGAIN

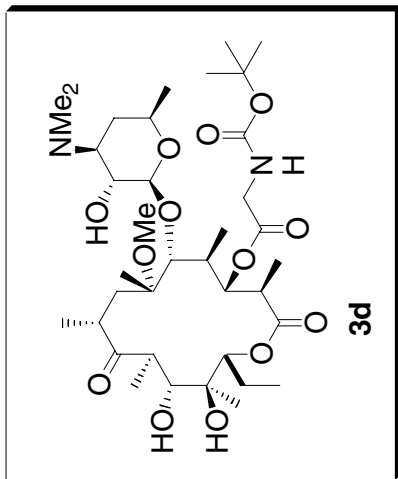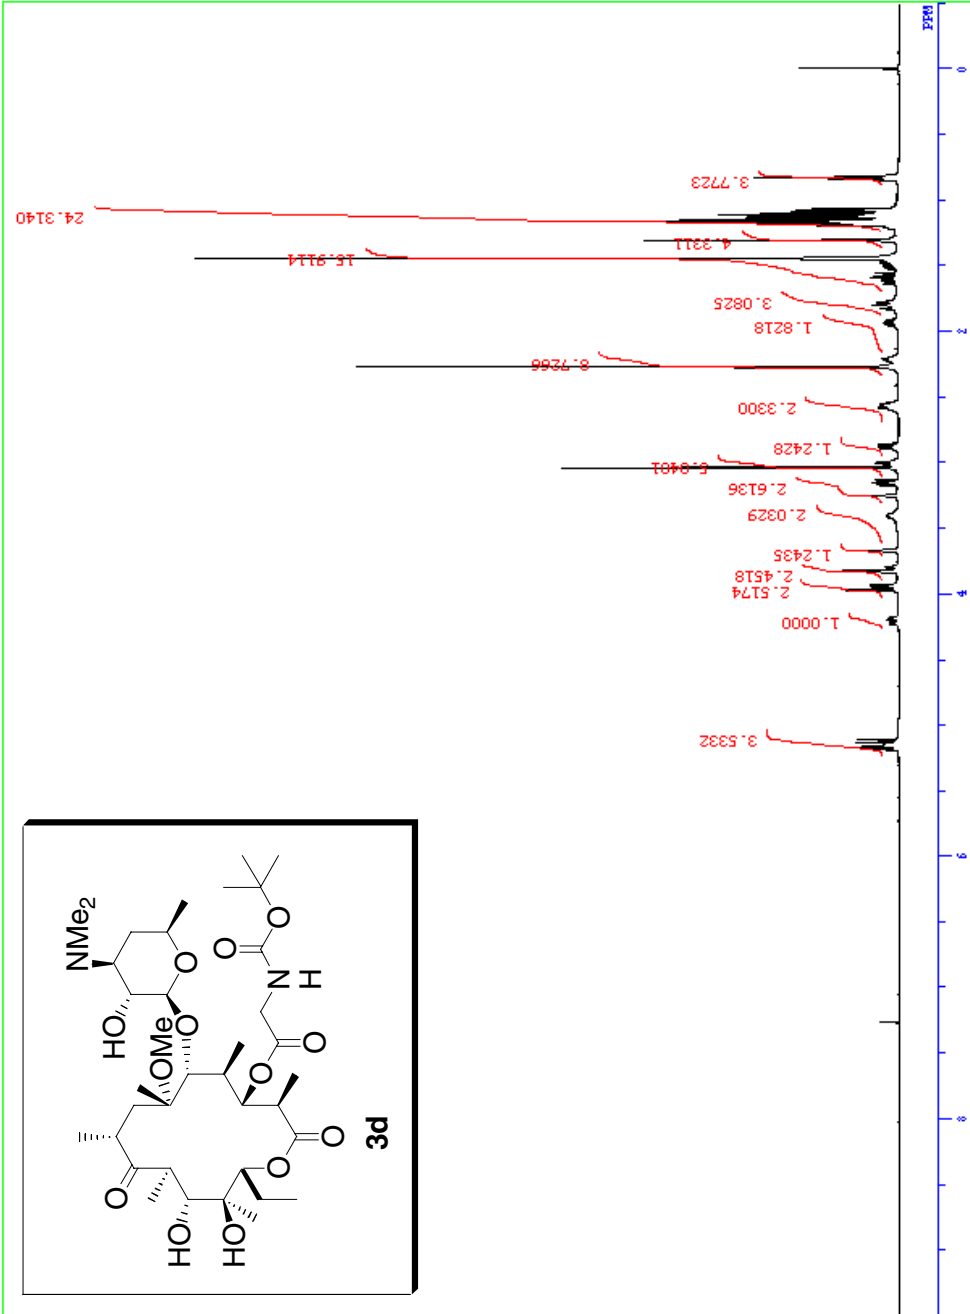

**Table 6.** Proton and carbon assignments of compound **3d**.

| 500MHz <sup>1</sup> H NMR data                    |                |      |               | 75MHz <sup>13</sup> C NMR data                    |                |
|---------------------------------------------------|----------------|------|---------------|---------------------------------------------------|----------------|
|                                                   | $\delta$ (ppm) | Peak | <i>J</i> (Hz) |                                                   | $\delta$ (ppm) |
| C <sub>2</sub> -H                                 | 2.88           | m    | -             | C <sub>1</sub>                                    | 173.5          |
| 2-Me                                              | 1.08           | d    | 7.3           | C <sub>2</sub>                                    | 42.9           |
| C <sub>3</sub> -H                                 | 5.13           | d    | 11.6          | C <sub>2</sub> -Me                                | 15.2           |
| C <sub>4</sub> -H                                 | 2.22           | m    | -             | C <sub>3</sub>                                    | 79.5           |
| 4-Me                                              | 1.17           | d    | 5.5           | C <sub>4</sub>                                    | 36.2           |
| C <sub>5</sub> -H                                 | 3.68           | d    | 3.1           | C <sub>4</sub> -Me                                | 8.9            |
| 6-Me                                              | 1.31           | s    | -             | C <sub>5</sub>                                    | 82.3           |
| 6-OMe                                             | 3.04           | s    | -             | C <sub>6</sub>                                    | 78.0           |
| C <sub>7</sub> -H                                 | 1.58           | d    | 14.6          | C <sub>6</sub> -Me                                | 19.3           |
|                                                   | 1.80           | dd   | 14.6, 12.2    | C <sub>6</sub> -OMe                               | 50.0           |
| C <sub>8</sub> -H                                 | 2.53 – 2.62    | m    | -             | C <sub>7</sub>                                    | 38.7           |
| 8-Me                                              | 1.11           | d    | 8.5           | C <sub>8</sub>                                    | 45.3           |
| C <sub>10</sub> -H                                | 3.00           | m    | -             | C <sub>8</sub> -Me                                | 17.9           |
| 10-Me                                             | 1.13           | d    | 6.7           | C <sub>9</sub>                                    | 220.7          |
| C <sub>11</sub> -H                                | 3.83           | s    | -             | C <sub>10</sub>                                   | 37.3           |
| 12-Me                                             | 1.16           | s    | -             | C <sub>10</sub> -Me                               | 12.5           |
| C <sub>13</sub> -H                                | 5.18           | dd   | 11.6, 2.4     | C <sub>11</sub>                                   | 69.5           |
| C <sub>14</sub> -H                                | 1.45 – 1.53    | m    | -             | C <sub>12</sub>                                   | 74.2           |
|                                                   | 1.94           | m    | -             | C <sub>12</sub> -Me                               | 16.1           |
| C <sub>15</sub> -H                                | 0.83           | t    | 7.3           | C <sub>13</sub>                                   | 77.2           |
| C <sub>1</sub> '-H                                | 3.94           | d    | 7.3           | C <sub>14</sub>                                   | 21.2           |
| C <sub>2</sub> '-H                                | 3.16           | dd   | 10.4, 7.3     | C <sub>15</sub>                                   | 10.4           |
| C <sub>3</sub> '-H                                | 2.53 – 2.62    | m    | -             | C <sub>1</sub> '                                  | 103.9          |
| C <sub>3</sub> '-NMe <sub>2</sub>                 | 2.28           | s    | -             | C <sub>2</sub> '                                  | 70.5           |
| C <sub>4</sub> '-H                                | 1.16 – 1.22    | m    | -             | C <sub>3</sub> '                                  | 65.4           |
|                                                   | 1.63           | m    | -             | C <sub>3</sub> '-NMe <sub>2</sub>                 | 40.2           |
| C <sub>5</sub> '                                  | 3.41           | m    | -             | C <sub>4</sub> '                                  | 28.4           |
| C <sub>5</sub> '-Me                               | 1.19           | d    | 6.1           | C <sub>5</sub> '                                  | 69.5           |
| OH                                                | 3.26           | br s | -             | C <sub>5</sub> '-Me                               | 21.1           |
|                                                   | 3.98           | s    | -             | -CO <sub>2</sub> C(CH <sub>3</sub> ) <sub>3</sub> | 28.3           |
| C <sub>3</sub> -COCH <sub>2</sub> NH-             | 4.21           | dd   | 18.3, 7.3     | -CO <sub>2</sub> C(CH <sub>3</sub> ) <sub>3</sub> | 79.9           |
|                                                   | 3.79 – 3.83    | m    | -             | C <sub>3</sub> -COCH <sub>2</sub> NH-             | 42.6           |
| -CO <sub>2</sub> C(CH <sub>3</sub> ) <sub>3</sub> | 1.45           | s    | -             | C <sub>3</sub> -COCH <sub>2</sub> NH-             | 170.4          |

DEFILE

D:\Tarakawa\journal\TES0835  
 COMMENT TES0835:lh-rwr  
 DATEIN Thu Jun 14 12:10:41 2001  
 LH non  
 EXMNUC non  
 OBSFO 499.10 MHz  
 OBSRT 120.00 MHz  
 OBSFM 8250.0 Hz  
 POINT 32768  
 FREQ0 9980.0 Hz  
 STANG 0  
 ACQTM 3.283 sec  
 PD 3.000 sec  
 PUL 6.4 us  
 IRRUC LH  
 CTEMP 24.0 c  
 SLOMT CDCL2  
 EXERT 0.00 ppm  
 BF 1.00 Hz  
 RGAIN 15

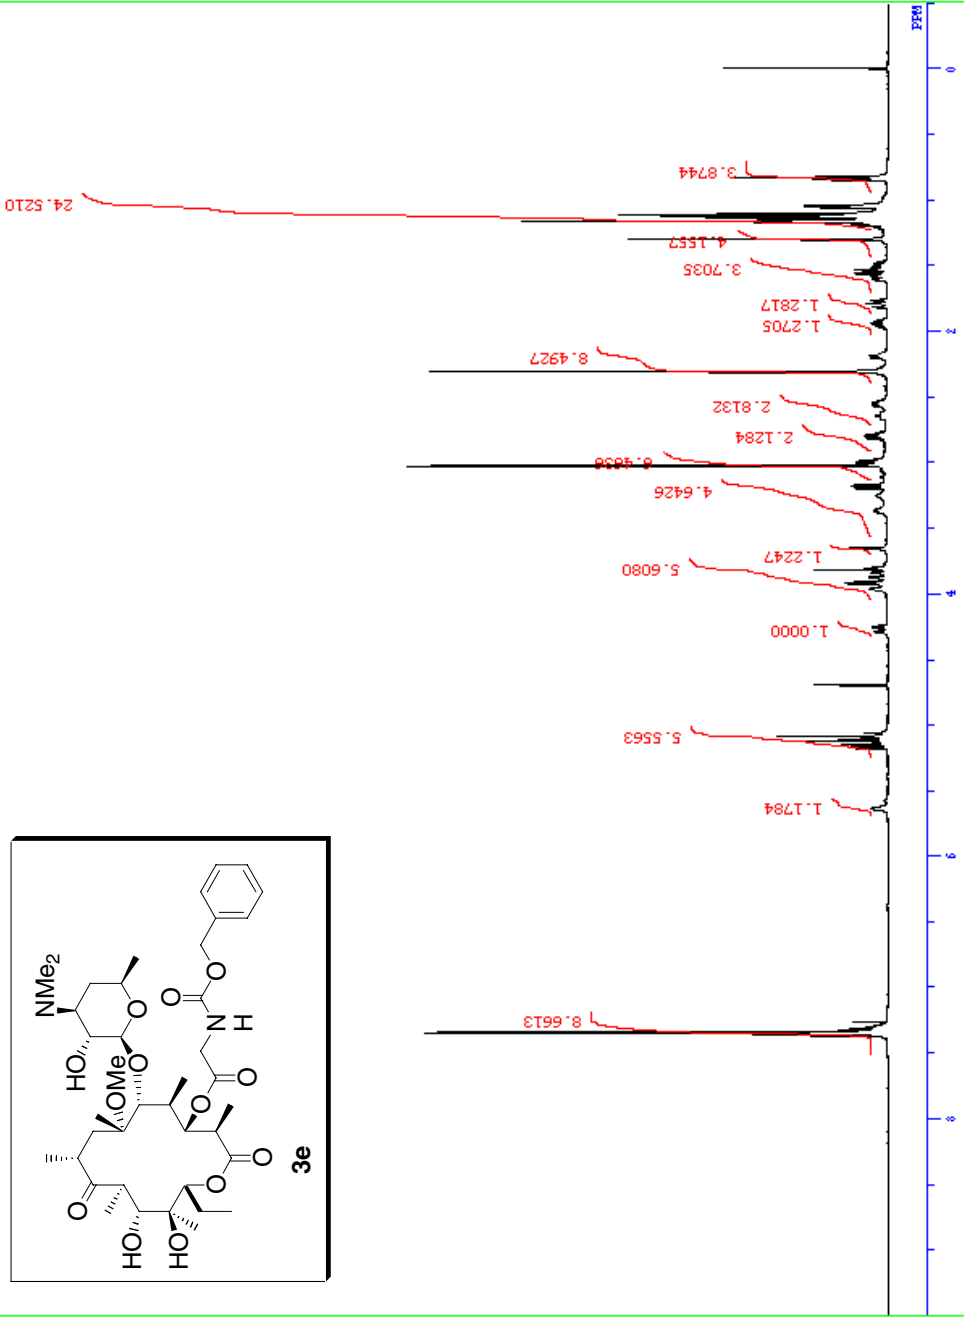

**Table 7.** Proton and carbon assignments of compound **3e**.

| 500MHz <sup>1</sup> H NMR data      |                |      |               | 75MHz <sup>13</sup> C NMR data        |                |
|-------------------------------------|----------------|------|---------------|---------------------------------------|----------------|
|                                     | $\delta$ (ppm) | peak | <i>J</i> (Hz) |                                       | $\delta$ (ppm) |
| C <sub>2</sub> -H                   | 2.80           | m    | -             | C <sub>1</sub>                        | 173.5          |
| 2-Me                                | 1.05           | d    | 6.7           | C <sub>2</sub>                        | 42.9           |
| C <sub>3</sub> -H                   | 5.10           | d    | 10.7          | C <sub>2</sub> -Me                    | 15.2           |
| C <sub>4</sub> -H                   | 2.19           | m    | -             | C <sub>3</sub>                        | 79.8           |
| 4-Me                                | 1.13           | d    | 8.5           | C <sub>4</sub>                        | 36.2           |
| C <sub>5</sub> -H                   | 3.66           | d    | 2.7           | C <sub>4</sub> -Me                    | 8.9            |
| 6-Me                                | 1.30           | s    | -             | C <sub>5</sub>                        | 83.2           |
| 6-OMe                               | 3.03           | s    | -             | C <sub>6</sub>                        | 78.0           |
| C <sub>7</sub> -H                   | 1.55           | dd   | 14.6, 1.2     | C <sub>6</sub> -Me                    | 19.4           |
|                                     | 1.79           | dd   | 14.6, 11.9    | C <sub>6</sub> -OMe                   | 50.0           |
| C <sub>8</sub> -H                   | 2.56           | m    | -             | C <sub>7</sub>                        | 38.7           |
| 8-Me                                | 1.11           | d    | 7.3           | C <sub>8</sub>                        | 45.3           |
| C <sub>10</sub> -H                  | 3.00           | m    | -             | C <sub>8</sub> -Me                    | 17.9           |
| 10-Me                               | 1.16           | s    | -             | C <sub>9</sub>                        | 220.7          |
| C <sub>11</sub> -H                  | 3.82           | d    | 1.5           | C <sub>10</sub>                       | 37.3           |
| 12-Me                               | 0.84           | t    | 7.3           | C <sub>10</sub> -Me                   | 12.5           |
| C <sub>13</sub> -H                  | 5.17           | dd   | 11.3, 2.4     | C <sub>11</sub>                       | 69.5           |
| C <sub>14</sub> -H                  | 1.51           | m    | -             | C <sub>12</sub>                       | 74.2           |
|                                     | 1.95           | m    | -             | C <sub>12</sub> -Me                   | 16.1           |
| C <sub>15</sub> -H                  | 0.84           | t    | 7.3           | C <sub>13</sub>                       | 77.1           |
| C <sub>1</sub> '-H                  | 3.92           | d    | 7.0           | C <sub>14</sub>                       | 21.2           |
| C <sub>2</sub> '-H                  | 3.18           | dd   | 10.4, 7.3     | C <sub>15</sub>                       | 10.4           |
| C <sub>3</sub> '-H                  | 2.64           | m    | -             | C <sub>1</sub> '                      | 104.1          |
| C <sub>3</sub> '-NMe <sub>2</sub>   | 2.31           | s    | -             | C <sub>2</sub> '                      | 70.3           |
| C <sub>4</sub> '-H                  | 1.13 – 1.19    | m    | -             | C <sub>3</sub> '                      | 65.7           |
|                                     | 1.60           | m    | -             | C <sub>3</sub> '-NMe <sub>2</sub>     | 40.0           |
| C <sub>5</sub> '                    | 3.37           | m    | -             | C <sub>4</sub> '                      | 28.6           |
| C <sub>5</sub> '-Me                 | 1.17           | d    | 4.9           | C <sub>5</sub> '                      | 69.2           |
| OH                                  | 3.26           | br   | -             | C <sub>5</sub> '-Me                   | 21.1           |
|                                     | 3.97           | br   | -             | C <sub>3</sub> -COCH <sub>2</sub> NH- | 43.1           |
| -CO <sub>2</sub> CH <sub>2</sub> Ph | 5.08           | d    | 12.2          | C <sub>3</sub> -COCH <sub>2</sub> NH- | 170.0          |
|                                     | 5.14           | d    |               | -CO <sub>2</sub> CH <sub>2</sub> Ph   | 67.0           |
| -CO <sub>2</sub> CH <sub>2</sub> Ph | 7.31 – 7.37    | m    | -             | -CO <sub>2</sub> CH <sub>2</sub> Ph   | 156.3          |
| -CH <sub>2</sub> NHCO-              | 5.64           | br t | -             | -CO <sub>2</sub> CH <sub>2</sub> Ph   | 128.1          |
| -CH <sub>2</sub> NHCO-              | 3.86           | dd   | 18.6, 4.0     |                                       | 128.2          |
|                                     | 4.27           | dd   | 18.6, 7.3     |                                       | 128.5          |
|                                     |                |      |               |                                       | 136.3          |

D:\Tarakawa\journal\TES0571  
 TES0571.LH-rwr  
 Date\_Thu Jun 21 17:24:53 2001  
 LH  
 name  
 EXPNO 439.10 MHz  
 OBSRV 120.00 MHz  
 OBSID 8250.0 Hz  
 POINT 32763  
 FREQ0 9380.0 Hz  
 STANG 0  
 ACQTM 3.283 sec  
 PD 3.000 sec  
 PUL 6.4 us  
 IPRUC LH  
 CTEMP 24.1 c  
 SLOMT CDCL3  
 EXERT 0.00 ppm  
 RF 1.00 Hz  
 RGAIN 17

PROFILE  
 COMMENT  
 DATE  
 OBSID  
 POINT  
 FREQ0  
 STANG  
 ACQTM  
 PD  
 PUL  
 IPRUC  
 CTEMP  
 SLOMT  
 EXERT  
 RF  
 RGAIN

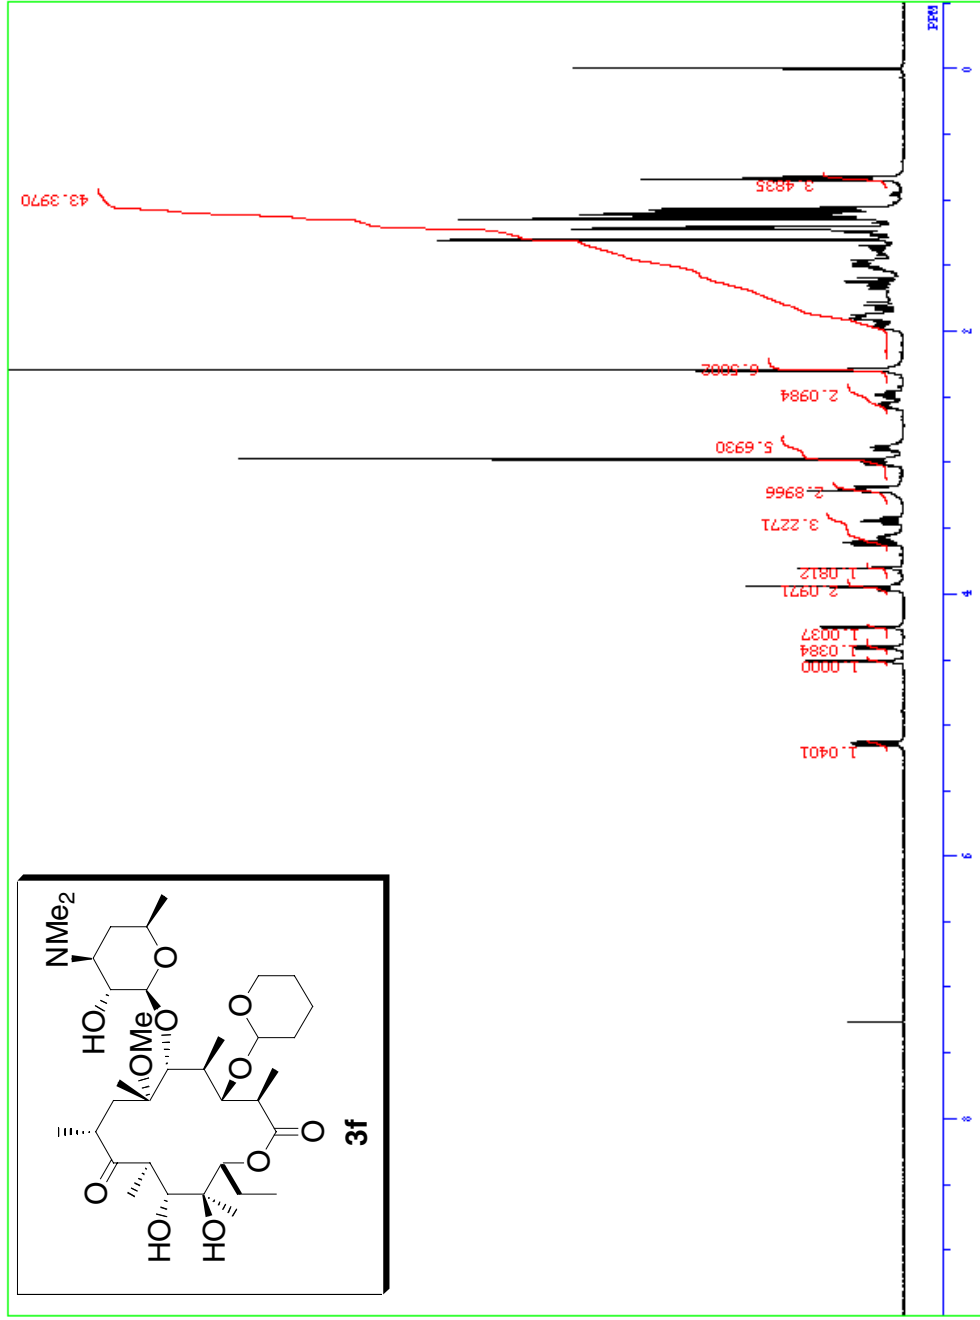

**Table 8.** Proton and carbon assignments of compound **3f**.

| 500MHz <sup>1</sup> H NMR data    |                |      |                 | 75MHz <sup>13</sup> C NMR data    |                |
|-----------------------------------|----------------|------|-----------------|-----------------------------------|----------------|
|                                   | $\delta$ (ppm) | peak | <i>J</i> (Hz)   |                                   | $\delta$ (ppm) |
| C <sub>2</sub> -H                 | 2.89           | m    | -               | C <sub>1</sub>                    | 175.3          |
| 2-Me                              | 1.22           | d    | 7.0             | C <sub>2</sub>                    | 44.4           |
| C <sub>3</sub> -H                 | 3.62           | d    | 11.3            | C <sub>2</sub> -Me                | 15.5           |
| C <sub>4</sub> -H                 | 1.88 – 1.99    | m    | -               | C <sub>3</sub>                    | 80.9           |
| 4-Me                              | 1.07           | d    | 7.6             | C <sub>4</sub>                    | 36.7           |
| C <sub>5</sub> -H                 | 4.23           | d    | 4.0             | C <sub>4</sub> -Me                | 9.1            |
| 6-Me                              | 1.31           | s    | -               | C <sub>5</sub>                    | 79.2           |
| 6-OMe                             | 2.98           | s    | -               | C <sub>6</sub>                    | 78.0           |
| C <sub>7</sub> -H                 | 1.61           | dd   | 14.6, 1.5       | C <sub>6</sub> -Me                | 19.5           |
|                                   | 1.81           | dd   | 14.6, 12.2      | C <sub>6</sub> -OMe               | 50.0           |
| C <sub>8</sub> -H                 | 2.57           | m    | -               | C <sub>7</sub>                    | 38.8           |
| 8-Me                              | 1.10           | d    | 7.3             | C <sub>8</sub>                    | 45.5           |
| C <sub>10</sub> -H                | 3.01           | m    | -               | C <sub>8</sub> -Me                | 18.0           |
| 10-Me                             | 1.12           | d    | 7.0             | C <sub>9</sub>                    | 221.1          |
| C <sub>11</sub> -H                | 3.81           | d    | 1.2             | C <sub>10</sub>                   | 37.3           |
| 12-Me                             | 1.15           | s    | -               | C <sub>10</sub> -Me               | 12.5           |
| C <sub>13</sub> -H                | 5.14           | dd   | 11.3, 2.4       | C <sub>11</sub>                   | 69.4           |
| C <sub>14</sub> -H                | 1.35 – 1.56    | m    | -               | C <sub>12</sub>                   | 74.3           |
|                                   | 1.88 – 1.99    | m    | -               | C <sub>12</sub> -Me               | 16.1           |
| C <sub>15</sub> -H                | 0.84           | t    | 7.3             | C <sub>13</sub>                   | 76.6           |
| C <sub>1</sub> '-H                | 4.52           | d    | 7.6             | C <sub>14</sub>                   | 22.8           |
| C <sub>2</sub> '-H                | 3.20           | dd   | 10.6, 7.6       | C <sub>15</sub>                   | 10.5           |
| C <sub>3</sub> '-H                | 2.49           | ddd  | 12.2, 10.4, 4.3 | C <sub>1</sub> '                  | 101.9          |
| C <sub>3</sub> '-NMe <sub>2</sub> | 2.30           | s    | -               | C <sub>2</sub> '                  | 70.8           |
| C <sub>4</sub> '-H                | 1.17-1.27      | m    | -               | C <sub>3</sub> '                  | 66.0           |
|                                   | 1.66           | m    | -               | C <sub>3</sub> '-NMe <sub>2</sub> | 40.4           |
| C <sub>5</sub> '                  | 3.58           | m    | -               | C <sub>4</sub> '                  | 29.0           |
| C <sub>5</sub> '-Me               | 1.22           | d    | 6.4             | C <sub>5</sub> '                  | 68.7           |
| THP(C <sub>1</sub> -H)            | 4.41           | dd   | 9.4, 1.2        | C <sub>5</sub> '-Me               | 21.2           |
| THP(C <sub>2</sub> -H)            | 1.88 – 1.99    | m    | -               | THP(C <sub>1</sub> )              | 102.6          |
| THP(C <sub>3</sub> -H)            | 1.35 - 1.56    | m    | -               | THP(C <sub>2</sub> )              | 31.4           |
|                                   | 1.88 – 1.99    | m    | -               | THP(C <sub>3</sub> )              | 21.2           |
| THP(C <sub>4</sub> -H)            | 1.35 – 1.56    | m    | -               | THP(C <sub>4</sub> )              | 25.4           |
| THP(C <sub>5</sub> -H)            | 3.45           | ddd  | 11.6, 11.6, 2.4 | THP(C <sub>5</sub> )              | 66.3           |
|                                   | 3.95 – 3.97    | m    | -               |                                   |                |
| OH                                | 3.22           | br s | -               |                                   |                |
|                                   | 3.95           | s    | -               |                                   |                |

D:\Tarakawa\journal\TES0594  
 TES0594-50L...1H-NMR/TEMING

DEFILE  
 COMMENT  
 IN&TIN  
 OBMUC  
 EXMAD  
 OBTRO  
 OBTET  
 OBTIN  
 POINT  
 FREQD  
 STANG  
 ACQTM  
 PD  
 PUL  
 IERUC  
 CTEMP  
 SLOM  
 EXERT  
 BF  
 RGAIN

LH  
 SINGLE-ROW  
 500.00 MHz  
 160.00 MHz  
 2410.0 Hz  
 16284  
 10000.0 Hz  
 0  
 1.638 sec  
 4.362 sec  
 5.9 us  
 LH  
 28.8 c  
 CDCL3  
 0.00 ppm  
 1.00 Hz  
 16

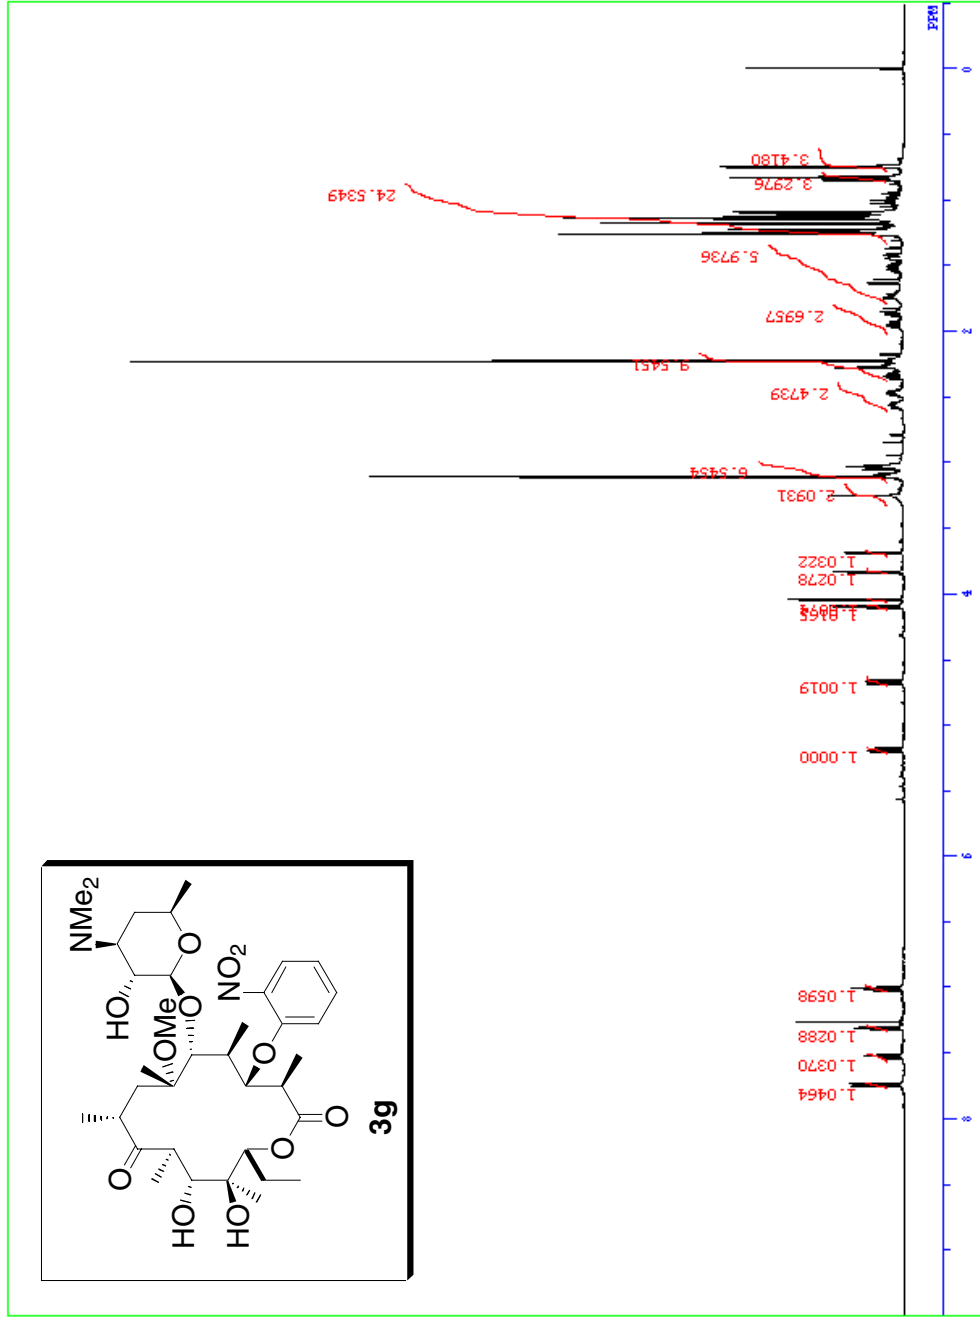



**Table 9.** Proton and carbon assignments of compound **3g**.

| 500MHz <sup>1</sup> H NMR data    |                |      |                 | 75MHz <sup>13</sup> C NMR data    |                |
|-----------------------------------|----------------|------|-----------------|-----------------------------------|----------------|
|                                   | $\delta$ (ppm) | peak | <i>J</i> (Hz)   |                                   | $\delta$ (ppm) |
| C <sub>2</sub> -H                 | 3.08 – 3.11    | m    | -               | C <sub>1</sub>                    | 174.4          |
| 2-Me                              | 1.10           | d    | 7.3             | C <sub>2</sub>                    | 44.0           |
| C <sub>3</sub> -H                 | 4.68           | d    | 10.4            | C <sub>2</sub> -Me                | 15.4           |
| C <sub>4</sub> -H                 | 2.25 – 2.28    | m    | -               | C <sub>3</sub>                    | 82.5           |
| 4-Me                              | 1.24           | d    | 7.3             | C <sub>4</sub>                    | 37.0           |
| C <sub>5</sub> -H                 | 3.69           | d    | 3.7             | C <sub>4</sub> -Me                | 8.3            |
| 6-Me                              | 1.26           | s    | -               | C <sub>5</sub>                    | 78.6           |
| 6-OMe                             | 3.11           | s    | -               | C <sub>6</sub>                    | 78.2           |
| C <sub>7</sub> -H                 | 1.62           | dd   | 14.7, 1.2       | C <sub>6</sub> -Me                | 19.3           |
|                                   | 1.85           | dd   | 14.7, 12.2      | C <sub>6</sub> -OMe               | 50.2           |
| C <sub>8</sub> -H                 | 2.57           | m    | -               | C <sub>7</sub>                    | 38.6           |
| 8-Me                              | 1.13           | d    | 7.3             | C <sub>8</sub>                    | 45.5           |
| C <sub>10</sub> -H                | 3.02 – 3.05    | m    | -               | C <sub>8</sub> -Me                | 17.8           |
| 10-Me                             | 1.15           | d    | 6.7             | C <sub>9</sub>                    | 220.9          |
| C <sub>11</sub> -H                | 3.84           | d    | 1.8             | C <sub>10</sub>                   | 37.3           |
| 12-Me                             | 1.18           | s    | -               | C <sub>10</sub> -Me               | 12.5           |
| C <sub>13</sub> -H                | 5.19           | dd   | 11.0, 2.4       | C <sub>11</sub>                   | 69.6           |
| C <sub>14</sub> -H                | 1.52           | m    | -               | C <sub>12</sub>                   | 74.2           |
|                                   | 1.96           | m    | -               | C <sub>12</sub> -Me               | 16.1           |
| C <sub>15</sub> -H                | 0.84           | t    | 7.3             | C <sub>13</sub>                   | 77.3           |
| C <sub>1</sub> '-H                | 4.10           | d    | 7.3             | C <sub>14</sub>                   | 21.1           |
| C <sub>2</sub> '-H                | 3.02 – 3.05    | m    | -               | C <sub>15</sub>                   | 10.4           |
| C <sub>3</sub> '-H                | 2.34           | m    | -               | C <sub>1</sub> '                  | 101.3          |
| C <sub>3</sub> '-NMe <sub>2</sub> | 2.23           | s    | -               | C <sub>2</sub> '                  | 70.4           |
| C <sub>4</sub> '-H                | 1.02           | m    | 12.8, 1.8, 1.8, | C <sub>3</sub> '                  | 65.2           |
|                                   | 1.43           | dq   | 1.8             | C <sub>3</sub> '-NMe <sub>2</sub> | 40.2           |
| C <sub>5</sub> '                  | 2.47           | m    | -               | C <sub>4</sub> '                  | 28.4           |
| C <sub>5</sub> '-Me               | 0.75           | d    | 6.1             | C <sub>5</sub> '                  | 69.0           |
| OH                                | 3.26           | s    | -               | C <sub>5</sub> '-Me               | 20.8           |
|                                   | 4.05           | s    | -               | -Ph(C <sub>1</sub> )              | 152.2          |
| -Ph(C <sub>3</sub> -H)            | 7.75           | dd   | 7.9, 1.8        | -Ph(C <sub>2</sub> )              | 140.2          |
| -Ph(C <sub>4</sub> -H)            | 7.01           | t    | 7.9             | -Ph(C <sub>3</sub> )              | 125.4          |
| -Ph(C <sub>5</sub> -H)            | 7.53           | m    | -               | -Ph(C <sub>4</sub> )              | 120.1          |
| -Ph(C <sub>6</sub> -H)            | 7.31           | d    | 8.6             | -Ph(C <sub>5</sub> )              | 133.6          |
|                                   |                |      |                 | -Ph(C <sub>3</sub> )              | 113.4          |

```

DETAIL
COMMENT  D:\Tarakawa\journal\TES0819
DATEIN   TES0819.LH-rwr
TIME     Thu Jun 7 14:44:50 2001
INSTRUM LH
EXMNUC  non
ORPROQ   499.10 MHz
ORSETT   120.00 MHz
ORF1IN   8450.0 Hz
POINT    32768
FREQUD   9980.0 Hz
STANG    0
ACQUM    3.283 sec
PD        3.000 sec
PWL       6.4 us
INRUC    LH
CTEMP    25.0 c
SLOMT    CDCL2
EXPERT   0.00 ppm
RF        1.00 Hz
RGAIN    17

```

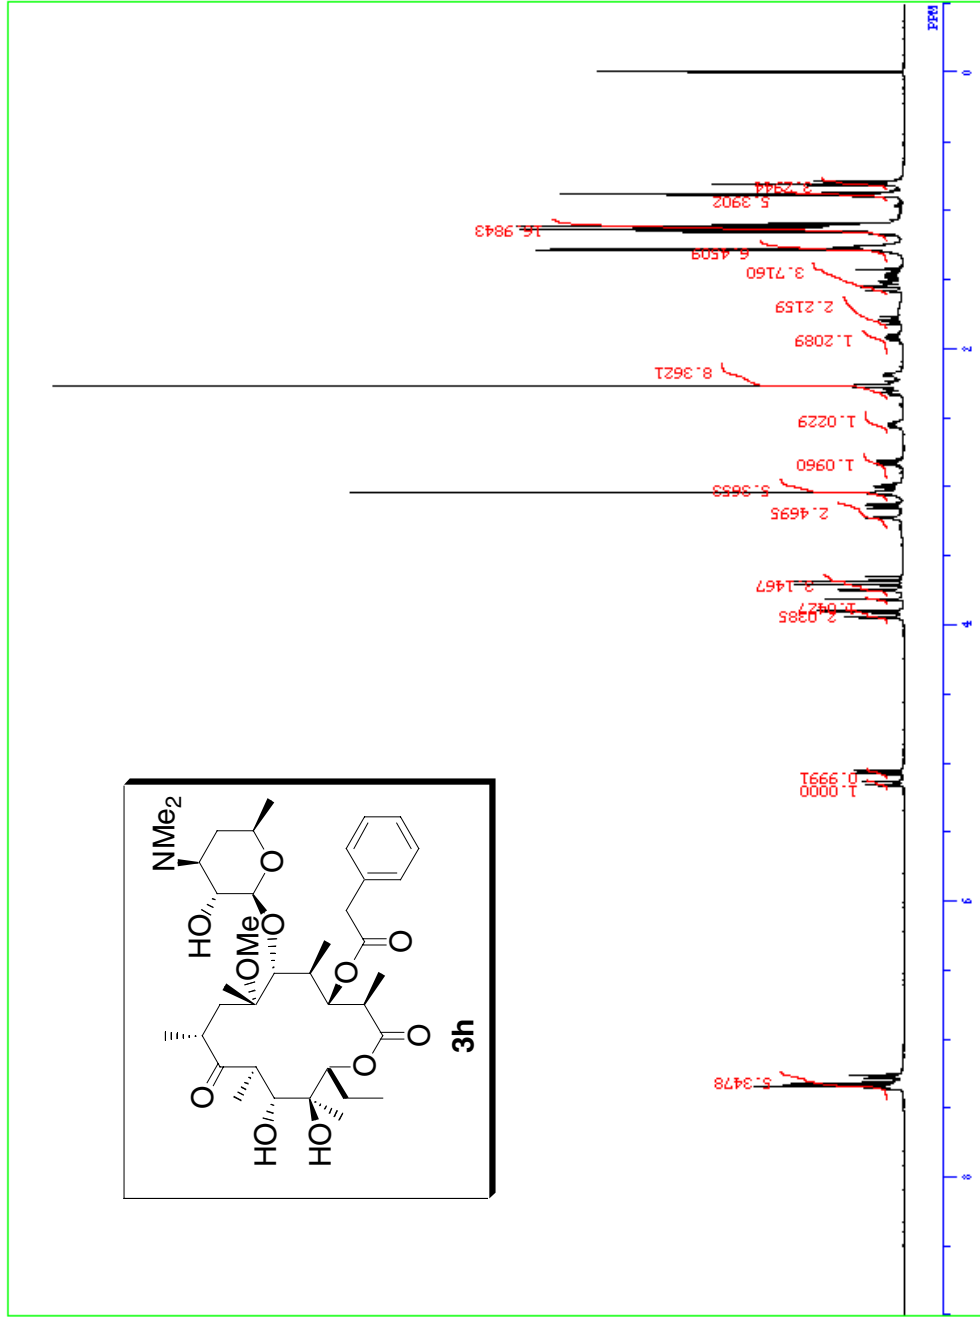

**Table 10.** Proton and carbon assignments of compound **3h**.

| 500MHz <sup>1</sup> H NMR data    |                |      |               | 75MHz <sup>13</sup> C NMR data       |                |
|-----------------------------------|----------------|------|---------------|--------------------------------------|----------------|
|                                   | $\delta$ (ppm) | peak | <i>J</i> (Hz) |                                      | $\delta$ (ppm) |
| C <sub>2</sub> -H                 | 2.83           | m    | -             | C <sub>1</sub>                       | 173.6          |
| 2-Me                              | 0.89           | d    | 6.4           | C <sub>2</sub>                       | 43.0           |
| C <sub>3</sub> -H                 | 5.07           | d    | 11.3          | C <sub>2</sub> -Me                   | 15.0           |
| C <sub>4</sub> -H                 | 2.20           | m    | -             | C <sub>3</sub>                       | 78.5           |
| 4-Me                              | 1.16           | d    | 7.6           | C <sub>4</sub>                       | 36.2           |
| C <sub>5</sub> -H                 | 3.75           | d    | 3.7           | C <sub>4</sub> -Me                   | 9.0            |
| 6-Me                              | 1.29           | s    | -             | C <sub>5</sub>                       | 81.1           |
| 6-OMe                             | 3.05           | s    | -             | C <sub>6</sub>                       | 78.0           |
| C <sub>7</sub> -H                 | 1.80           | dd   | 14.9, 11.6    | C <sub>6</sub> -Me                   | 19.4           |
|                                   | 1.57           | dd   | 14.9, 1.5     | C <sub>6</sub> -OMe                  | 50.1           |
| C <sub>8</sub> -H                 | 2.56           | m    | -             | C <sub>7</sub>                       | 38.7           |
| 8-Me                              | 1.11           | d    | 7.3           | C <sub>8</sub>                       | 45.3           |
| C <sub>10</sub> -H                | 2.98 – 3.08    | m    | -             | C <sub>8</sub> -Me                   | 18.0           |
| 10-Me                             | 1.12           | d    | 7.0           | C <sub>9</sub>                       | 220.6          |
| C <sub>11</sub> -H                | 3.82           | d    | 1.5           | C <sub>10</sub>                      | 37.3           |
| 12-Me                             | 1.15           | s    | -             | C <sub>10</sub> -Me                  | 12.5           |
| C <sub>13</sub> -H                | 5.15           | dd   | 11.3, 2.4     | C <sub>11</sub>                      | 69.4           |
| C <sub>14</sub> -H                | 1.41 – 1.55    | m    | -             | C <sub>12</sub>                      | 74.2           |
|                                   | 1.92           | m    | -             | C <sub>12</sub> -Me                  | 16.1           |
| C <sub>15</sub> -H                | 0.81           | t    | 7.3           | C <sub>13</sub>                      | 77.0           |
| C <sub>1</sub> '-H                | 3.91           | d    | 7.3           | C <sub>14</sub>                      | 21.1           |
| C <sub>2</sub> '-H                | 3.14           | dd   | 10.4, 7.3     | C <sub>15</sub>                      | 10.4           |
| C <sub>3</sub> '-H                | 2.32           | m    | -             | C <sub>1</sub> '                     | 103.3          |
| C <sub>3</sub> '-NMe <sub>2</sub> | 2.27           | s    | -             | C <sub>2</sub> '                     | 70.5           |
| C <sub>4</sub> '-H                | 1.07 – 1.19    | m    | -             | C <sub>3</sub> '                     | 65.8           |
|                                   | 1.41 – 1.55    | m    | -             | C <sub>3</sub> '-NMe <sub>2</sub>    | 40.3           |
| C <sub>5</sub> '                  | 2.98 – 3.08    | m    | -             | C <sub>4</sub> '                     | 28.3           |
| C <sub>5</sub> '-Me               | 1.13           | d    | 6.1           | C <sub>5</sub> '                     | 69.4           |
| OH                                | 3.23           | br s | -             | C <sub>5</sub> '-Me                  | 21.0           |
|                                   | 3.95           | br s | -             | C <sub>3</sub> -COCH <sub>2</sub> Ph | 41.5           |
| -COCH <sub>2</sub> Ph             | 3.67           | d    | 15.2          | C <sub>3</sub> -COCH <sub>2</sub> Ph | 171.1          |
|                                   | 3.73           | d    | 15.2          | C <sub>3</sub> -COCH <sub>2</sub> Ph | 127.3          |
| -COCH <sub>2</sub> Ph             | 7.26 – 7.36    | m    | -             |                                      | 128.6          |
|                                   |                |      |               |                                      | 129.5          |
|                                   |                |      |               |                                      | 133.6          |

D:\Tarakawa\journal\TES0856  
TES0856-SOL...1H-NMR/TEMING

DEFILE  
CONDT  
DATA  
EXMOD  
OBSFQ  
OBSFZ  
OBSF3  
POINT  
PRESO  
STANG  
ACQIN  
PD  
PUL  
IRPUC  
CTEMP  
SLOMT  
EXCMT  
RF  
RGAIN

1H  
SINGL-RON  
500.00 MHz  
160.00 MHz  
2410.0 Hz  
16284  
10000.0 Hz  
%  
1.638 sec  
4.362 sec  
5.9 us  
1H  
26.3 c  
CDCL3  
0.00 ppm  
1.00 Hz  
13

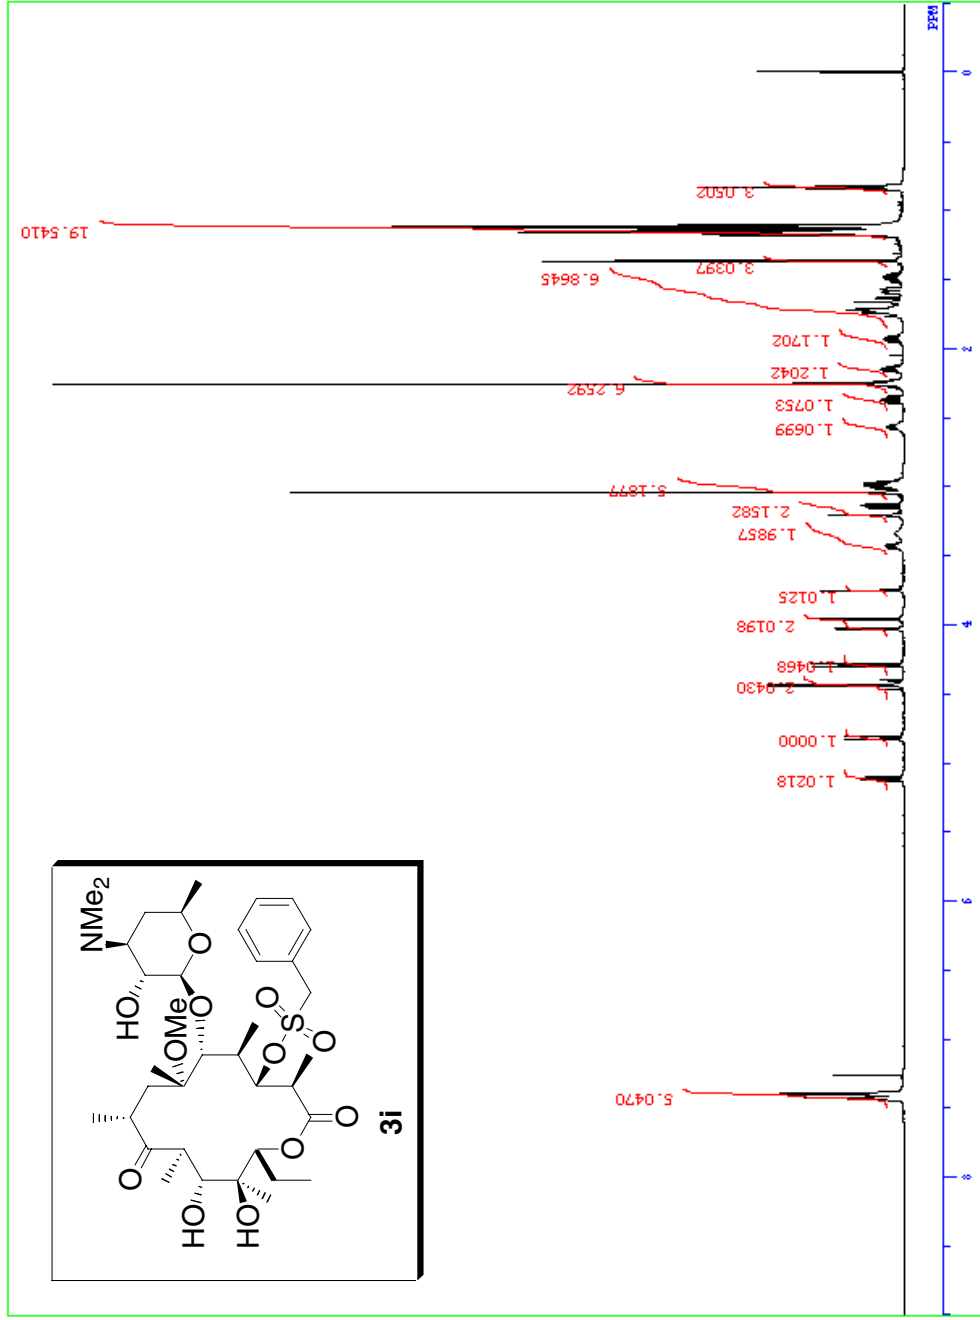

**Table 11.** Proton and carbon assignments of compound **3i**.

| 500MHz <sup>1</sup> H NMR data      |                |      |                     | 75MHz <sup>13</sup> C NMR data                     |                |
|-------------------------------------|----------------|------|---------------------|----------------------------------------------------|----------------|
|                                     | $\delta$ (ppm) | peak | <i>J</i> (Hz)       |                                                    | $\delta$ (ppm) |
| C <sub>2</sub> -H                   | 2.95 – 3.02    | m    | -                   | C <sub>1</sub>                                     | 173.3          |
| 2-Me                                | 1.17           | d    | 6.7                 | C <sub>2</sub>                                     | 43.6           |
| C <sub>3</sub> -H                   | 4.82           | d    | 11.0                | C <sub>2</sub> -Me                                 | 16.5           |
| C <sub>4</sub> -H                   | 2.15           | m    | -                   | C <sub>3</sub>                                     | 85.9           |
| 4-Me                                | 1.15           | d    | 7.9                 | C <sub>4</sub>                                     | 37.9           |
| C <sub>5</sub> -H                   | 4.03           | d    | 4.9                 | C <sub>4</sub> -Me                                 | 8.8            |
| 6-Me                                | 1.37           | s    | -                   | C <sub>5</sub>                                     | 80.0           |
| 6-OMe                               | 3.05           | s    | -                   | C <sub>6</sub>                                     | 78.3           |
| C <sub>7</sub> -H                   | 1.65           | dd   | 14.7, 1.8           | C <sub>6</sub> -Me                                 | 19.5           |
|                                     | 1.72 – 1.77    | m    | -                   | C <sub>6</sub> -OMe                                | 50.5           |
| C <sub>8</sub> -H                   | 2.57           | m    | -                   | C <sub>7</sub>                                     | 39.0           |
| 8-Me                                | 1.12           | d    | 7.3                 | C <sub>8</sub>                                     | 45.1           |
| C <sub>10</sub> -H                  | 2.95 – 3.02    | m    | -                   | C <sub>8</sub> -Me                                 | 18.0           |
| 10-Me                               | 1.12           | d    | 6.7                 | C <sub>9</sub>                                     | 220.7          |
| C <sub>11</sub> -H                  | 3.76           | d    | 1.2                 | C <sub>10</sub>                                    | 37.2           |
| 12-Me                               | 1.12           | s    | -                   | C <sub>10</sub> -Me                                | 12.3           |
| C <sub>13</sub> -H                  | 5.12           | dd   | 11.6, 2.4           | C <sub>11</sub>                                    | 69.2           |
| C <sub>14</sub> -H                  | 1.49           | m    | -                   | C <sub>12</sub>                                    | 74.2           |
|                                     | 1.93           | m    | -                   | C <sub>12</sub> -Me                                | 16.0           |
| C <sub>15</sub> -H                  | 0.84           | t    | 7.3                 | C <sub>13</sub>                                    | 77.4           |
| C <sub>1</sub> '-H                  | 4.30           | d    | 7.3                 | C <sub>14</sub>                                    | 21.0           |
| C <sub>2</sub> '-H                  | 3.14           | dd   | 9.8, 7.3            | C <sub>15</sub>                                    | 10.4           |
| C <sub>3</sub> '-H                  | 2.37           | m    | -                   | C <sub>1</sub> '                                   | 102.7          |
| C <sub>3</sub> '-NMe <sub>2</sub>   | 2.26           | s    | -                   | C <sub>2</sub> '                                   | 70.7           |
| C <sub>4</sub> '-H                  | 1.14 – 1.20    | m    | 12.8, 1.8, 1.8, 1.8 | C <sub>3</sub> '                                   | 65.8           |
|                                     | 1.58           | dq   |                     | C <sub>3</sub> '-NMe <sub>2</sub>                  | 40.2           |
| C <sub>5</sub> '                    | 3.44           | m    | -                   | C <sub>4</sub> '                                   | 28.3           |
| C <sub>5</sub> '-Me                 | 1.16           | d    | 5.5                 | C <sub>5</sub> '                                   | 68.8           |
| OH                                  | 3.21           | s    | -                   | C <sub>5</sub> '-Me                                | 21.1           |
|                                     | 3.34           | br   | -                   | C <sub>3</sub> -SO <sub>2</sub> CH <sub>2</sub> Ph | 57.5           |
| -SO <sub>2</sub> CH <sub>2</sub> Ph | 4.46           | d    | 14.0                | C <sub>3</sub> -SO <sub>2</sub> CH <sub>2</sub> Ph | 128.0          |
|                                     | 4.46           | d    |                     |                                                    | 128.8          |
| -SO <sub>2</sub> CH <sub>2</sub> Ph | 7.38 – 7.44    | m    | -                   |                                                    | 129.0          |
|                                     |                |      |                     |                                                    | 130.8          |

DEFILE  
COMMENT  
DATEIN  
LH  
EXMOD  
EXPRO  
OSZET  
OSZET  
POINT  
FREQ0  
STANG  
ACQTN  
PD  
PUL  
IRPUC  
CTEMP  
SLOMT  
EXPERT  
RF  
RGAIN

D:\Tarakawa\journal\TES0777  
TES0777:lh-rwr  
Thu Jun 7 09:13:45 2001  
non  
499.10 MHz  
120.00 MHz  
8450.0 Hz  
32768  
9980.0 Hz  
0  
3.283 sec  
3.000 sec  
6.4 us  
25.9 c  
CDCL3  
0.00 ppm  
1.00 Hz  
15

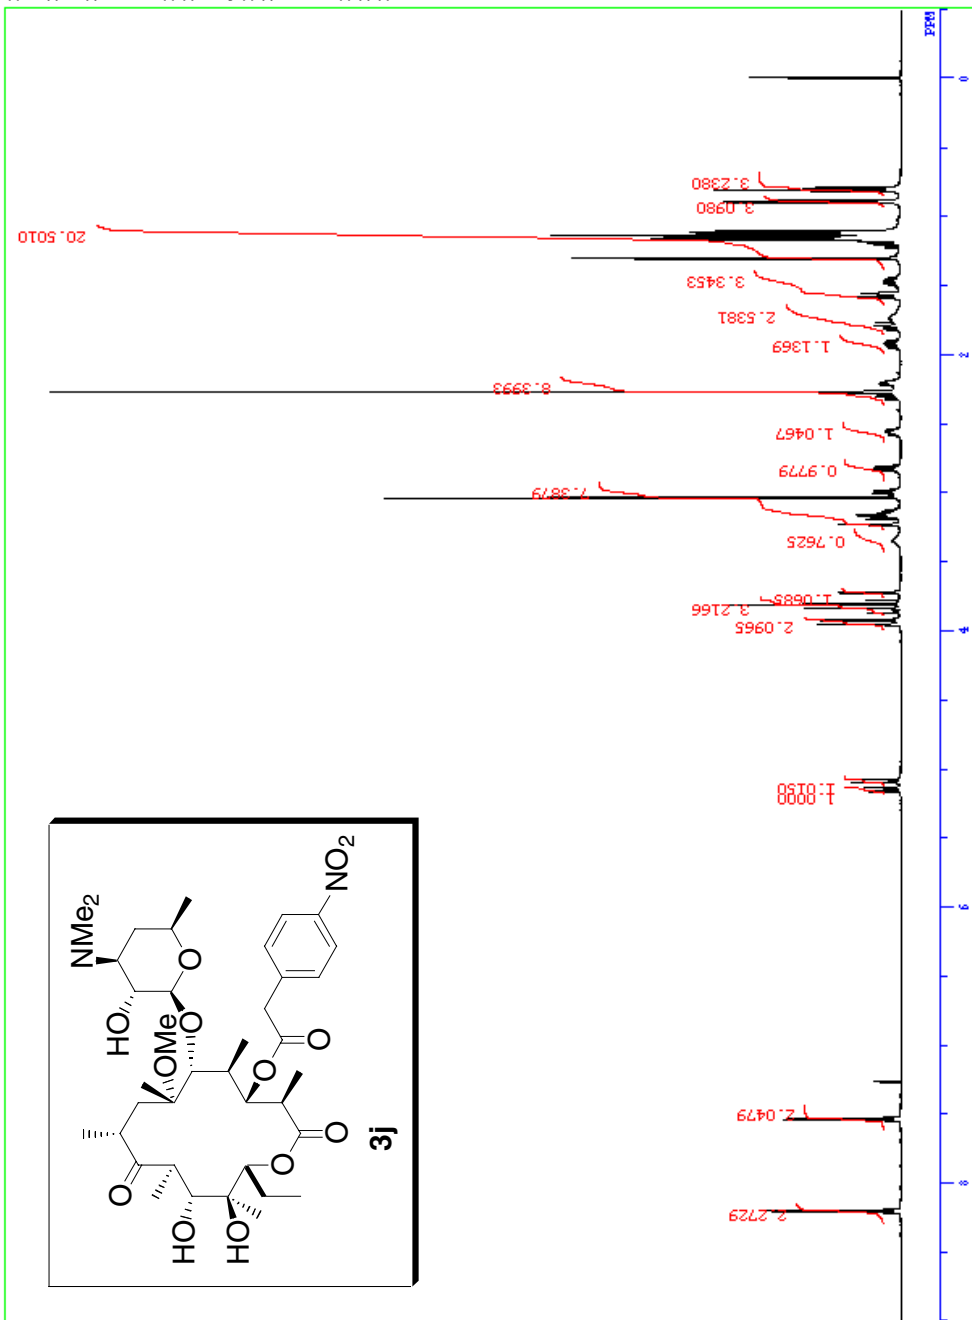

**Table 12.** Proton and carbon assignments of compound **3j**.

| 500MHz <sup>1</sup> H NMR data    |                      |      |               | 75MHz <sup>13</sup> C NMR data       |                |
|-----------------------------------|----------------------|------|---------------|--------------------------------------|----------------|
|                                   | $\delta$ (ppm)       | peak | <i>J</i> (Hz) |                                      | $\delta$ (ppm) |
| C <sub>2</sub> -H                 | 2.83                 | m    | -             | C <sub>1</sub>                       | 173.4          |
| 2-Me                              | 0.90                 | d    | 6.7           | C <sub>2</sub>                       | 42.9           |
| C <sub>3</sub> -H                 | 5.09                 | d    | 11.0          | C <sub>2</sub> -Me                   | 15.1           |
| C <sub>4</sub> -H                 | 2.21                 | m    | -             | C <sub>3</sub>                       | 79.4           |
| 4-Me                              | 1.16                 | d    | 7.6           | C <sub>4</sub>                       | 36.3           |
| C <sub>5</sub> -H                 | 3.72                 | d    | 3.7           | C <sub>4</sub> -Me                   | 9.0            |
| 6-Me                              | 1.31                 | s    | -             | C <sub>5</sub>                       | 82.2           |
| 6-OMe                             | 3.04                 | s    | -             | C <sub>6</sub>                       | 78.0           |
| C <sub>7</sub> -H                 | 1.79                 | dd   | 14.6, 11.9    | C <sub>6</sub> -Me                   | 19.4           |
|                                   | 1.56 – 1.59          | m    | -             | C <sub>6</sub> -OMe                  | 50.1           |
| C <sub>8</sub> -H                 | 2.56                 | m    | -             | C <sub>7</sub>                       | 38.8           |
| 8-Me                              | 1.12                 | d    | 7.0           | C <sub>8</sub>                       | 45.3           |
| C <sub>10</sub> -H                | 3.00                 | m    | -             | C <sub>8</sub> -Me                   | 17.9           |
| 10-Me                             | 1.12                 | d    | 7.0           | C <sub>9</sub>                       | 220.6          |
| C <sub>11</sub> -H                | 3.81                 | s    | -             | C <sub>10</sub>                      | 37.3           |
| 12-Me                             | 1.15                 | s    | -             | C <sub>10</sub> -Me                  | 12.4           |
| C <sub>13</sub> -H                | 5.15                 | dd   | 11.3, 2.1     | C <sub>11</sub>                      | 69.5           |
| C <sub>14</sub> -H                | 1.47                 | m    | -             | C <sub>12</sub>                      | 74.2           |
|                                   | 1.93                 | m    | -             | C <sub>12</sub> -Me                  | 16.1           |
| C <sub>15</sub> -H                | 0.81                 | t    | 7.3           | C <sub>13</sub>                      | 77.2           |
| C <sub>1</sub> '-H                | 3.92                 | d    | 7.3           | C <sub>14</sub>                      | 21.1           |
| C <sub>2</sub> '-H                | 3.17                 | dd   | 10.4, 7.3     | C <sub>15</sub>                      | 10.4           |
| C <sub>3</sub> '-H                | 2.30                 | m    | -             | C <sub>1</sub> '                     | 104.0          |
| C <sub>3</sub> '-NMe <sub>2</sub> | 2.27                 | s    | -             | C <sub>2</sub> '                     | 70.4           |
| C <sub>4</sub> '-H                | 1.16 – 1.23          | m    | -             | C <sub>3</sub> '                     | 66.2           |
|                                   | 1.56 – 1.59          | m    | -             | C <sub>3</sub> '-NMe <sub>2</sub>    | 40.3           |
| C <sub>5</sub> '                  | 3.15                 | m    | -             | C <sub>4</sub> '                     | 28.2           |
| C <sub>5</sub> '-Me               | 1.17                 | d    | 6.1           | C <sub>5</sub> '                     | 69.7           |
| OH                                | 3.23<br>3.35<br>3.96 | br s | -             | C <sub>5</sub> '-Me                  | 21.1           |
|                                   |                      | br   | -             | C <sub>3</sub> -COCH <sub>2</sub> Ph | 41.1           |
|                                   |                      | s    | -             | C <sub>3</sub> -COCH <sub>2</sub> Ph | 169.9          |
| -COCH <sub>2</sub> Ph             | 3.96                 | d    | 15.5          | C <sub>3</sub> -COCH <sub>2</sub> Ph | 123.7          |
|                                   | 3.86                 | d    | 15.5          |                                      | 130.5          |
| -COCH <sub>2</sub> Ph             | 7.54                 | m    | -             |                                      | 140.9          |
|                                   | 8.21                 | m    | -             |                                      | 147.3          |

D:\Tarakawa\journal\TMS0367  
 TMS0367...1H-NMR/TEMING08

NAME  
 DATE  
 INSTR  
 PULP  
 PROC  
 FREQ  
 STANG  
 ACQ  
 PD  
 PUL  
 IPRUC  
 CTEMP  
 SLOMT  
 EXERT  
 BF  
 RGAIN

1H  
 SINGLE-PHOS  
 1.00000 Hz  
 500.00 MHz  
 160.00 MHz  
 2410.0 Hz  
 16284  
 10000.0 Hz  
 0  
 1.638 sec  
 4.362 sec  
 5.9 us  
 1H  
 24.4 c  
 CDCL3  
 0.00 ppm  
 1.00 Hz  
 17

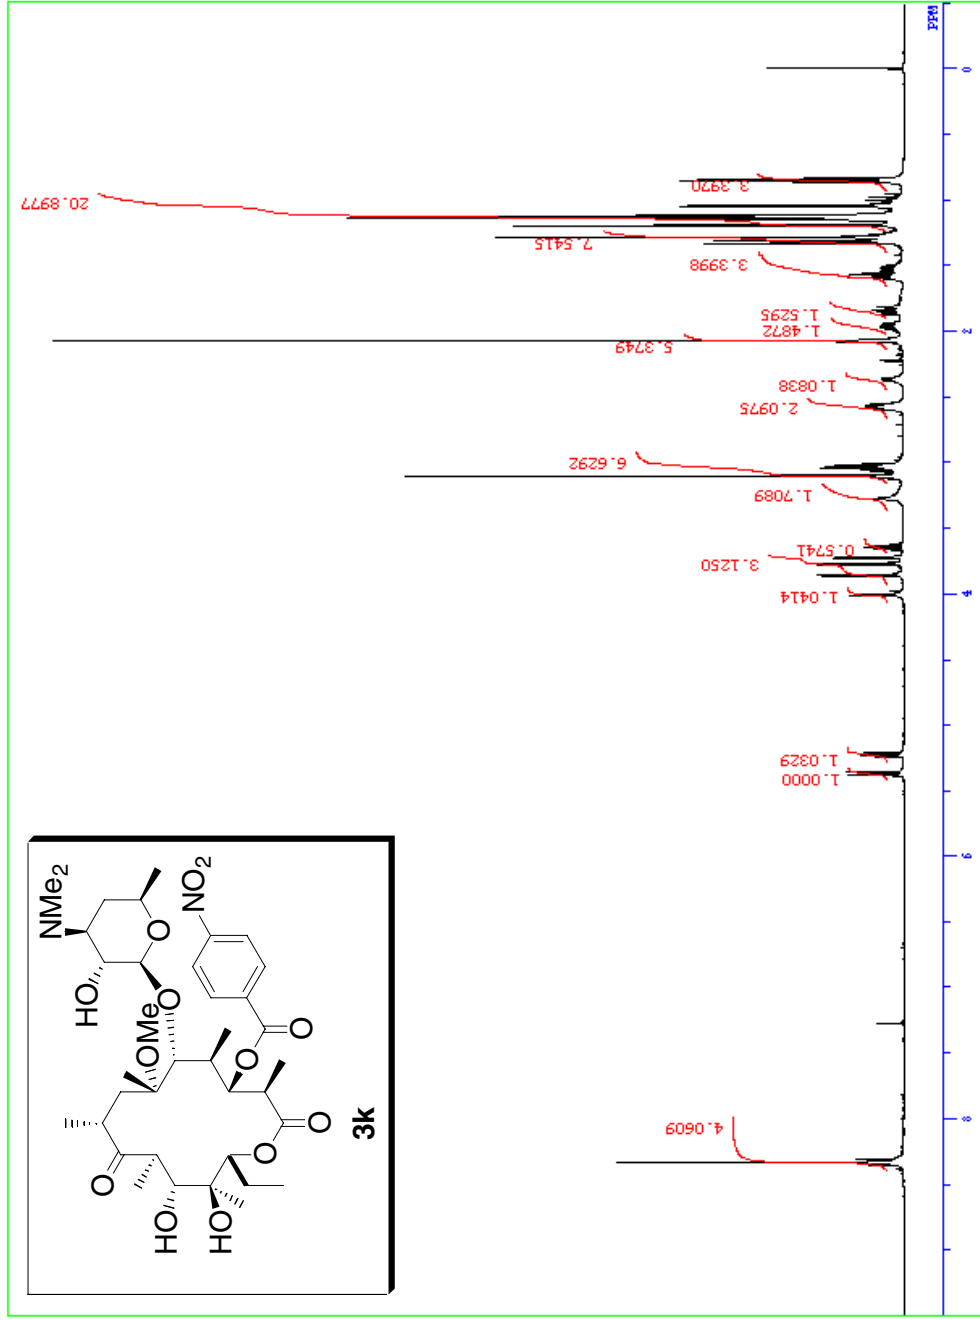



**Table 13.** Proton and carbon assignments of compound **3k**.

| 500MHz <sup>1</sup> H NMR data    |                |      |               | 75MHz <sup>13</sup> C NMR data    |                |
|-----------------------------------|----------------|------|---------------|-----------------------------------|----------------|
|                                   | $\delta$ (ppm) | peak | <i>J</i> (Hz) |                                   | $\delta$ (ppm) |
| C <sub>2</sub> -H                 | 3.01 – 3.13    | m    | -             | C <sub>1</sub>                    | 173.4          |
| 2-Me                              | 1.12 – 1.17    | m    | -             | C <sub>2</sub>                    | 42.9           |
| C <sub>3</sub> -H                 | 5.38           | d    | 11.0          | C <sub>2</sub> -Me                | 15.3           |
| C <sub>4</sub> -H                 | 2.37           | m    | -             | C <sub>3</sub>                    | 80.1           |
| 4-Me                              | 1.32           | d    | 7.9           | C <sub>4</sub>                    | 36.4           |
| C <sub>5</sub> -H                 | 3.73           | d    | 3.1           | C <sub>4</sub> -Me                | 9.1            |
| 6-Me                              | 1.29           | s    | -             | C <sub>5</sub>                    | 81.3           |
| 6-OMe                             | 3.10           | s    | -             | C <sub>6</sub>                    | 77.9           |
| C <sub>7</sub> -H                 | 1.84           | m    | -             | C <sub>6</sub> -Me                | 19.3           |
|                                   | 1.49 – 1.61    | m    | -             | C <sub>6</sub> -OMe               | 50.1           |
| C <sub>8</sub> -H                 | 2.54 – 2.59    | m    | -             | C <sub>7</sub>                    | 38.7           |
| 8-Me                              | 1.12 – 1.17    | m    | -             | C <sub>8</sub>                    | 45.4           |
| C <sub>10</sub> -H                | 3.01 – 3.13    | m    | -             | C <sub>8</sub> -Me                | 17.9           |
| 10-Me                             | 1.12 – 1.17    | m    | -             | C <sub>9</sub>                    | 220.6          |
| C <sub>11</sub> -H                | 3.87           | d    | 1.2           | C <sub>10</sub>                   | 37.3           |
| 12-Me                             | 1.20           | s    | -             | C <sub>10</sub> -Me               | 12.5           |
| C <sub>13</sub> -H                | 5.23           | dd   | 11.0, 1.8     | C <sub>11</sub>                   | 69.5           |
| C <sub>14</sub> -H                | 1.97           | m    | -             | C <sub>12</sub>                   | 74.2           |
|                                   | 1.49 – 1.61    | m    | -             | C <sub>12</sub> -Me               | 16.1           |
| C <sub>15</sub> -H                | 0.85           | t    | 7.3           | C <sub>13</sub>                   | 77.3           |
| C <sub>1</sub> '-H                | 3.78           | d    | 7.3           | C <sub>14</sub>                   | 21.2           |
| C <sub>2</sub> '-H                | 3.01 – 3.13    | m    | -             | C <sub>15</sub>                   | 10.4           |
| C <sub>3</sub> '-H                | 1.49 – 1.61    | m    | -             | C <sub>1</sub> '                  | 103.0          |
| C <sub>3</sub> '-NMe <sub>2</sub> | 2.08           | s    | -             | C <sub>2</sub> '                  | 70.1           |
| C <sub>4</sub> '-H                | 1.26 – 1.33    | m    | -             | C <sub>3</sub> '                  | 65.8           |
|                                   | 0.96 – 1.05    | m    | -             | C <sub>3</sub> '-NMe <sub>2</sub> | 40.1           |
| C <sub>5</sub> '                  | 2.54 – 2.59    | m    | -             | C <sub>4</sub> '                  | 28.0           |
| C <sub>5</sub> '-Me               | 1.05           | d    | 6.1           | C <sub>5</sub> '                  | 69.5           |
| OH                                | 3.28           | br   | -             | C <sub>5</sub> '-Me               | 20.9           |
|                                   | 4.01           | br   | -             | C <sub>3</sub> -COPh              | 123.6          |
| -COPh                             | 8.30 – 8.36    | m    | -             |                                   | 131.2          |
|                                   |                |      |               |                                   | 135.8          |
|                                   |                |      |               |                                   | 150.8          |
|                                   |                |      |               | C <sub>3</sub> -COPh              | 164.2          |

D:\Vankawa\journal\EAL594L  
 TRM-EAL594L.H-rwr  
 Date: Tue Jul 17 07:37:16 2001

NAME LH  
 EXPNO 17  
 PROCNO 17  
 F2 - 499.10 MHz  
 F1 - 120.00 MHz  
 AQ - 8.850.0 Hz  
 POINT 32768  
 FREQ0 9980.0 Hz  
 STARG 0  
 ACQIN 3.283 sec  
 PD 3.000 sec  
 PUL 6.4 us  
 IROUC LH  
 CTEMP 28.1 c  
 SLOWT CDCL3  
 EXERT 0.00 ppm  
 RF 1.00 Hz  
 RGAIN 17

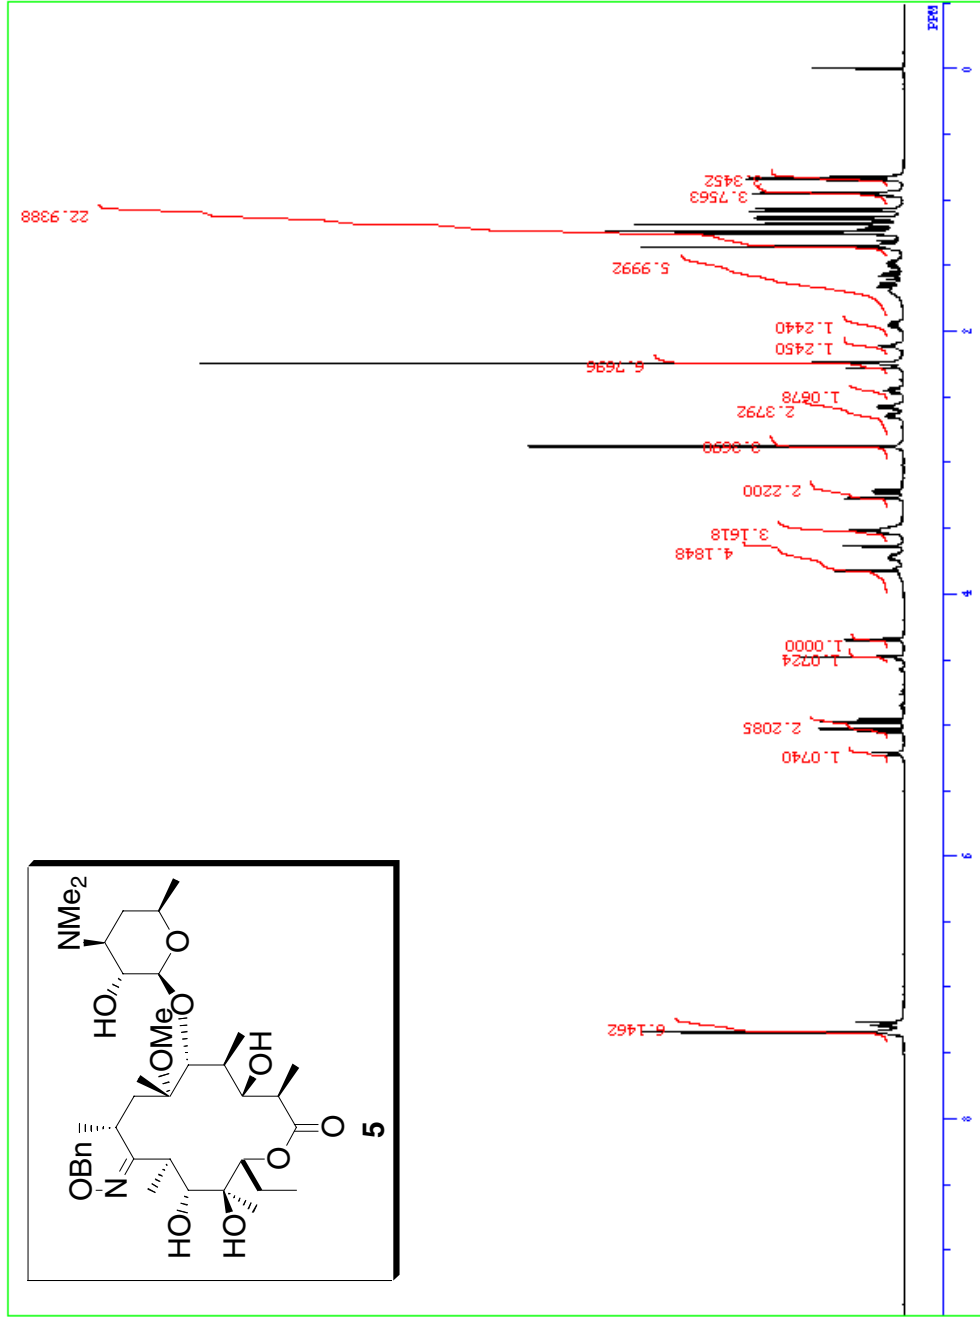

**Table 14.** Proton and carbon assignments of compound **5**.

| 500MHz <sup>1</sup> H NMR data    |                |      |               | 75MHz <sup>13</sup> C NMR data    |                |
|-----------------------------------|----------------|------|---------------|-----------------------------------|----------------|
|                                   | $\delta$ (ppm) | peak | <i>J</i> (Hz) |                                   | $\delta$ (ppm) |
| C <sub>2</sub> -H                 | 2.65           | m    | -             | C <sub>1</sub>                    | 175.0          |
| 2-Me                              | 1.25           | d    | 5.8           | C <sub>2</sub>                    | 44.6           |
| C <sub>3</sub> -H                 | 3.50 – 3.55    | m    | -             | C <sub>2</sub> -Me                | 15.2           |
| C <sub>4</sub> -H                 | 2.12           | m    | -             | C <sub>3</sub>                    | 79.0           |
| 4-Me                              | 1.08           | d    | 7.3           | C <sub>4</sub>                    | 36.0           |
| C <sub>5</sub> -H                 | 3.64           | d    | 1.2           | C <sub>4</sub> -Me                | 8.2            |
| 6-Me                              | 1.36           | s    | -             | C <sub>5</sub>                    | 88.2           |
| 6-OMe                             | 2.88           | s    | -             | C <sub>6</sub>                    | 78.4           |
| C <sub>7</sub> -H                 | 1.65           | m    | -             | C <sub>6</sub> -Me                | 18.8           |
|                                   | 1.19 – 1.24    | m    | -             | C <sub>6</sub> -OMe               | 49.5           |
| C <sub>8</sub> -H                 | 3.73           | m    | -             | C <sub>7</sub>                    | 28.1           |
| 8-Me                              | 0.95           | d    | 7.0           | C <sub>8</sub>                    | 26.4           |
| C <sub>10</sub> -H                | 2.58           | m    | -             | C <sub>8</sub> -Me                | 18.3           |
| 10-Me                             | 1.14           | d    | 7.0           | C <sub>9</sub>                    | 170.2          |
| C <sub>11</sub> -H                | 3.83           | d    | 1.5           | C <sub>10</sub>                   | 33.1           |
| 12-Me                             | 1.19           | s    | -             | C <sub>10</sub> -Me               | 15.4           |
| C <sub>13</sub> -H                | 5.22           | dd   | 11.0, 2.4     | C <sub>11</sub>                   | 70.6           |
| C <sub>14</sub> -H                | 1.49           | m    | -             | C <sub>12</sub>                   | 74.0           |
|                                   | 1.96           | m    | -             | C <sub>12</sub> -Me               | 16.2           |
| C <sub>15</sub> -H                | 0.84           | t    | 7.3           | C <sub>13</sub>                   | 76.9           |
| C <sub>1</sub> '-H                | 4.35           | d    | 7.3           | C <sub>14</sub>                   | 21.7           |
| C <sub>2</sub> '-H                | 3.22           | dd   | 10.4, 7.3     | C <sub>15</sub>                   | 10.5           |
| C <sub>3</sub> '-H                | 2.45           | m    | -             | C <sub>1</sub> '                  | 106.8          |
| C <sub>3</sub> '-NMe <sub>2</sub> | 2.24           | s    | -             | C <sub>2</sub> '                  | 70.7           |
| C <sub>4</sub> '-H                | 1.58           | m    | -             | C <sub>3</sub> '                  | 65.7           |
|                                   | 1.32 – 1.37    | m    | -             | C <sub>3</sub> '-NMe <sub>2</sub> | 40.3           |
| C <sub>5</sub> '                  | 3.50 – 3.55    | m    | -             | C <sub>4</sub> '                  | 37.4           |
| C <sub>5</sub> '-Me               | 1.25           | d    | 5.8           | C <sub>5</sub> '                  | 70.3           |
| OH                                | 3.28           | br s | -             | C <sub>5</sub> '-Me               | 21.3           |
|                                   | 4.48           | s    | -             | -CH <sub>2</sub> Ph               | 75.8           |
| -CH <sub>2</sub> Ph               | 4.97           | d    | 11.6          |                                   | 127.7          |
|                                   | 5.05           | d    |               | -CH <sub>2</sub> Ph               | 128.3          |
| -CH <sub>2</sub> Ph               | 7.26 – 7.37    | m    | -             |                                   | 137.9          |



**Table 15.** Proton and carbon assignments of compound **7**.500MHz  $^1\text{H}$  NMR data

|                                   | $\delta$ (ppm) | peak | $J$ (Hz)  |
|-----------------------------------|----------------|------|-----------|
| C <sub>2</sub> -H                 | 2.84 – 2.95    | m    | -         |
| 2-Me                              | 1.21           | d    | 6.7       |
| C <sub>3</sub> -H                 | 3.54 – 3.60    | m    | -         |
| C <sub>4</sub> -H                 | 1.87 – 1.99    | m    | -         |
| 4-Me                              | 1.03           | d    | 7.3       |
| C <sub>5</sub> -H                 | 4.22           | d    | 3.7       |
| 6-Me                              | 1.30           | s    | -         |
| 6-OMe                             | 2.92           | s    | -         |
| C <sub>7</sub> -H                 | 1.30 – 1.53    | m    | -         |
| C <sub>8</sub> -H                 | 3.70           | m    | -         |
| 8-Me                              | 0.93           | d    | 6.7       |
| C <sub>10</sub> -H                | 2.57           | m    | -         |
| 10-Me                             | 1.13           | d    | 6.7       |
| C <sub>11</sub> -H                | 3.78           | d    | 1.8       |
| 12-Me                             | 1.15           | s    | -         |
| C <sub>13</sub> -H                | 5.19           | dd   | 11.0, 1.8 |
| C <sub>14</sub> -H                | 1.87 – 1.99    | m    | -         |
| C <sub>15</sub> -H                | 0.84           | t    | 7.3       |
| C <sub>1</sub> '-H                | 4.50           | d    | 7.3       |
| C <sub>2</sub> '-H                | 3.20           | dd   | 9.8, 7.3  |
| C <sub>3</sub> '-H                | 2.48           | m    | -         |
| C <sub>3</sub> '-NMe <sub>2</sub> | 2.30           | s    | -         |
| C <sub>4</sub> '-H                | 1.65           | m    | -         |
| C <sub>5</sub> '                  | 3.54 – 3.60    | m    | -         |
| C <sub>5</sub> '-Me               | 1.22           | d    | 6.1       |
| OH                                | 3.15           | br   | -         |
|                                   | 3.24           | s    | -         |
|                                   | 4.54           | s    | -         |
| -CH <sub>2</sub> Ph               | 4.98           | d    | 11.6      |
|                                   | 5.04           | d    |           |
| -CH <sub>2</sub> Ph               | 7.28 – 7.35    | m    | -         |
| THP(C <sub>1</sub> -H)            | 4.41           | dd   | 9.2, 1.2  |
| THP(C <sub>2</sub> -H)            | 3.44           | m    | -         |
| THP(C <sub>3</sub> -H)            | 1.30 – 1.53    | m    | -         |
| THP(C <sub>4</sub> -H)            | 1.30 – 1.53    | m    | -         |
| THP(C <sub>5</sub> -H)            | 1.30 – 1.53    | m    | -         |

75MHz <sup>13</sup>C NMR data

|                                   | $\delta$ (ppm)             |
|-----------------------------------|----------------------------|
| C <sub>1</sub>                    | 175.1                      |
| C <sub>2</sub>                    | 44.5                       |
| C <sub>2</sub> -Me                | 15.4                       |
| C <sub>3</sub>                    | 80.9                       |
| C <sub>4</sub>                    | 36.7                       |
| C <sub>4</sub> -Me                | 9.1                        |
| C <sub>5</sub>                    | 78.9                       |
| C <sub>6</sub>                    | 78.3                       |
| C <sub>6</sub> -Me                | 196                        |
| C <sub>6</sub> -OMe               | 50.0                       |
| C <sub>7</sub>                    | 37.2                       |
| C <sub>8</sub>                    | 26.4                       |
| C <sub>8</sub> -Me                | 18.6                       |
| C <sub>9</sub>                    | 170.4                      |
| C <sub>10</sub>                   | 33.0                       |
| C <sub>10</sub> -Me               | 15.3                       |
| C <sub>11</sub>                   | 70.4                       |
| C <sub>12</sub>                   | 74.0                       |
| C <sub>12</sub> -Me               | 16.1                       |
| C <sub>13</sub>                   | 76.9                       |
| C <sub>14</sub>                   | 214                        |
| C <sub>15</sub>                   | 10.5                       |
| C <sub>1</sub> '                  | 101.9                      |
| C <sub>2</sub> '                  | 70.9                       |
| C <sub>3</sub> '                  | 65.9                       |
| C <sub>3</sub> '-NMe <sub>2</sub> | 40.4                       |
| C <sub>4</sub> '                  | 29.2                       |
| C <sub>5</sub> '                  | 68.6                       |
| C <sub>5</sub> '-Me               | 21.2                       |
| -CH <sub>2</sub> Ph               | 75.7                       |
| -CH <sub>2</sub> Ph               | 127.6, 128.1, 128.3, 137.9 |
| THP(C <sub>1</sub> )              | 102.6                      |
| THP(C <sub>2</sub> )              | 66.3                       |
| THP(C <sub>3</sub> )              | 22.7                       |
| THP(C <sub>4</sub> )              | 25.4                       |
| THP(C <sub>5</sub> )              | 31.4                       |
